1 **Treatment of mice with IL2-complex enhances inflammasome-driven IFN- $\gamma$  production**  
2 **and prevents lethal toxoplasmosis**

3

4 **Short title: IL2-complex treatment prevents lethal toxoplasmosis**

5

6 Andreas Kupz<sup>1, \*</sup>, Saparna Pai<sup>1</sup>, Paul R. Giacomin<sup>1</sup>, Jennifer A. Whan<sup>2</sup>, Robert A. Walker<sup>1</sup>,

7 Pierre-Mehdi Hammoudi<sup>3</sup>, Nicholas C. Smith<sup>4, ¶</sup>, Catherine M. Miller<sup>1, 5 ¶</sup>

8

9 <sup>1</sup> Centre for Molecular Therapeutics, Australian Institute of Tropical Health and Medicine,

10 James Cook University, Cairns, QLD, Australia

11 <sup>2</sup> Advanced Analytical Centre, James Cook University, Cairns, QLD, Australia

12 <sup>3</sup> Department of Microbiology and Molecular Medicine, University of Geneva, Geneva,

13 Switzerland

14 <sup>4</sup> School of Science and Health, Western Sydney University, Parramatta South Campus, NSW,

15 Australia

16 <sup>5</sup> Discipline of Biomedicine, College of Public Health, Medical and Veterinary Science,

17 James Cook University, Cairns, QLD, Australia

18

19 \* Corresponding author:

20 Email: [andreas.kupz@jcu.edu.au](mailto:andreas.kupz@jcu.edu.au)

21

22 ¶ These authors contributed equally to this work.

23

## 24 **Abstract**

25 Toxoplasmic encephalitis is an AIDS-defining condition in HIV<sup>+</sup> individuals. The decline of  
26 IFN- $\gamma$ -producing CD4<sup>+</sup> T cells in AIDS is a major contributing factor in reactivation of  
27 quiescent *Toxoplasma gondii* to an actively replicating stage of infection. Hence, it is important  
28 to identify CD4-independent mechanisms to control acute *T. gondii* infection. Here we have  
29 investigated the targeted expansion and regulation of IFN- $\gamma$  production by CD8<sup>+</sup> T cells, DN T  
30 cells and NK cells in response to *T. gondii* infection using IL-2 complex (IL2C) pre-treatment  
31 in an acute *in vivo* mouse model. Our results show that expansion of CD8<sup>+</sup> T cells, DN T cells  
32 and NK cell by S4B6 IL2C treatment increases survival rates of mice infected with *T. gondii*  
33 and this increased survival is dependent on both IL-12- and IL-18-driven IFN- $\gamma$  production.  
34 Processing and secretion of IFN- $\gamma$ -inducing, bioactive IL-18 is dependent on the sensing of  
35 active parasite invasion by multiple redundant inflammasome sensors in multiple hematopoietic  
36 cell types but independent from *T. gondii*-derived dense granule (GRA) proteins. Our results  
37 provide evidence for a protective role of IL2C-mediated expansion of CD8<sup>+</sup> T cells, DN T cells  
38 and NK cells in murine toxoplasmosis and may represent a promising adjunct therapy for acute  
39 toxoplasmosis.

40

41

## 42 **Author Summary**

43 A third of the world's population is chronically infected with the parasite *Toxoplasma gondii*.  
44 In most cases the infection is asymptomatic, but in individuals suffering from AIDS,  
45 reactivation of brain and muscle cysts containing *T. gondii* is a significant cause of death. The  
46 gradual decline of CD4 T cells, the hallmark of AIDS, is believed to be a major contributing  
47 factor in reactivation of *T. gondii* infection and the development of acute disease. In this study,  
48 we show that targeted expansion of non-CD4 immune cell subsets can prevent severe disease  
49 and premature death via increased availability of interferon gamma-producing immune cells.  
50 We also demonstrate that the upstream signaling molecule interleukin-18 is required for the  
51 protective immune response by non-CD4 cells and show that the sensing of active parasite  
52 invasion by danger recognition molecules is crucial. Our findings reveal that targeted cell  
53 expansion may be a promising therapy in toxoplasmosis and suggests that the development of  
54 novel intervention strategies targeting danger recognition pathways may be useful against  
55 toxoplasmosis, particularly in the context of AIDS.

## 56 **Introduction**

57 *Toxoplasma gondii* (*T. gondii*) is an obligate intracellular parasite of the phylum Apicomplexa  
58 [1]. It is estimated that one-third of the world's population is infected with *T. gondii*. In most  
59 individuals, infection is asymptomatic and leads to chronic, life-long persistence of *T. gondii*-  
60 containing cysts, primarily in brain and muscle tissue [2]. Active disease, also known as  
61 toxoplasmosis, usually occurs after reactivation of encysted parasites, and is often associated  
62 with immunosuppression. If untreated, toxoplasmosis may be fatal. Additionally, serious eye  
63 disease has been reported as a result of infection with *T. gondii* [3] and, if a primary infection  
64 occurs during pregnancy, abortion, stillbirth and fetal abnormalities can occur [2, 4]. Whereas  
65 an acute infection is generally mediated by the fast-replicating tachyzoite stage of the parasite,  
66 the persistent tissue cysts, characteristic of a chronic infection, contain slow-replicating  
67 bradyzoites. Currently, treatment of toxoplasmosis is limited to the acute disease and requires  
68 prolonged exposure to anti-toxoplasmosis drugs for the duration of the immunosuppression [5,  
69 6].

70

71 Containment of chronic *T. gondii* infection requires functional T-cell responses, in particular  
72 interferon gamma (IFN- $\gamma$ )-producing CD4<sup>+</sup> T cells [2, 7]. In the absence of CD4<sup>+</sup> T cells, IFN-  
73  $\gamma$ , its receptor or downstream effector molecules, such as inducible nitric oxide synthase  
74 (iNOS), susceptibility and disease are severely exacerbated [8-11]. Accordingly, co-infection  
75 with human immunodeficiency virus (HIV), which impairs CD4<sup>+</sup> T cells during its  
76 reproduction, is one of the major reactivation factors. In fact, toxoplasmic encephalitis  
77 accompanied by low numbers of CD4<sup>+</sup> T cells is considered to be an AIDS-defining condition  
78 in HIV<sup>+</sup> individuals [12].

79

80 In addition to antigen-specific CD4<sup>+</sup> T cells [11], innate immune cells, such as NK cells and  
81 neutrophils also contribute significantly to the production of host-protective IFN- $\gamma$  [13, 14]. In



82 particular, the recognition of *T. gondii*-derived profilin via Toll-like receptor (TLR)-11, which  
83 drives myeloid differentiation primary-response protein 88 (MyD88)-dependent IL-12  
84 secretion by dendritic cells, is considered a crucial upstream pathway of protective IFN- $\gamma$   
85 secretion [15, 16]. Mice deficient in MyD88 or IL-12 are also extremely susceptible to *T. gondii*  
86 infection [17, 18]. Furthermore, elegant studies by Hunter and colleagues showed that T cell-  
87 intrinsic ablation of MyD88 also impacts severely on the control of the parasite [19]. These  
88 findings indicate that, in addition to IL-12, cytokine-driven IFN- $\gamma$  secretion in response to *T.*  
89 *gondii* also depends on IL-18, an IL-1 family cytokine originally known as IFN- $\gamma$ -inducing  
90 factor, which requires cell-intrinsic MyD88 signaling [20, 21]. IL-18 is particularly important  
91 for the rapid production of IFN- $\gamma$  by cells of the immune system, in particular NK cells, CD8<sup>+</sup>  
92 memory T cells and double negative (DN)  $\gamma\delta$  T cells [22].

93

94 Secretion of bioactive IL-18 requires proteolytic cleavage from its biologically inactive  
95 precursor, pro-IL-18, through caspase-1 [23], which in turn depends on the upstream assembly  
96 and activation of inflammasomes through the engagement of cytosolic pattern recognition  
97 receptors (PRRs) [23]. Intriguingly, not only deficiencies in caspase-1 and IL-18 [24, 25] have  
98 been implicated in impaired immunity to *T. gondii*, but also deficiencies in the inflammasome  
99 sensors NLRP1 and NLRP3 [24, 26]. These results point to an important host-protective role  
100 for the caspase1  $\rightarrow$  IL-18  $\rightarrow$  IFN- $\gamma$  axis and suggest that strategies aimed at targeting cytosolic  
101 PRRs as adjunct immunotherapy [27] could serve as a means of inducing IL-18-mediated IFN-  
102  $\gamma$  production to control infections with *T. gondii*. Consistent with this hypothesis, we and others  
103 have recently demonstrated, in models of experimental *Listeria monocytogenes*,  
104 *Mycobacterium tuberculosis* and *Salmonella enterica* infection, that rapid, IL-18-driven IFN- $\gamma$   
105 secretion orchestrates host innate immunity and impacts on the magnitude of the recall response  
106 after vaccination [28-30].

107

108 Given that control of acute toxoplasmosis depends on a delicate balance between limiting  
109 immunopathology and maintaining parasite killing, in the present study, we interrogated the  
110 mechanistic regulation of IL-18-driven IFN- $\gamma$  production *in vivo*. We discovered that bioactive  
111 IL-18 is dependent on the sensing of active parasite invasion by multiple redundant  
112 inflammasome sensors in multiple non-CD4 hematopoietic cell types, leading to the hypothesis  
113 that enhancement of this innate response could be harnessed to prevent disease resulting from  
114 infection with *T. gondii*. We therefore investigated if treatment with S4B6-containing IL2C, an  
115 IL2 complex that can boost NK and CD8<sup>+</sup> T cell numbers [31], could prevent acute lethal  
116 toxoplasmosis.

117

## 118 **RESULTS**

### 119 ***Toxoplasma*-driven IFN- $\gamma$ secretion by non-CD4 immune cells following oral infection** 120 **with brain cysts or intravenous (i.v.) infection with tachyzoites**

121 Given that control of acute toxoplasmosis critically depends on IFN- $\gamma$  [7] and non-CD4 immune  
122 cell types, such as CD8<sup>+</sup> T cells, DN T cells and NK cells, are prime IFN- $\gamma$  producers, we  
123 wanted to delineate the mechanistic requirements of IFN- $\gamma$  production by these cell types in  
124 response to *T. gondii*. We furthermore wanted to explore whether responses were similar after  
125 oral infection (a common natural route of infection), i.v. infection with tachyzoites (modelling  
126 blood transfusion, a rare but significant – for the individual – route of infection [32]) and the  
127 often used purely experimental i.p. route of infection with tachyzoites.

128

129 We first inoculated naïve B6 mice with 10, 40 or 100 *T. gondii* ME49 cysts and assessed IFN-  
130  $\gamma$  production by viable splenic CD3<sup>+</sup>CD4<sup>+</sup>, CD3<sup>+</sup>CD8<sup>+</sup>, CD3<sup>+</sup>CD4<sup>-</sup>CD8<sup>-</sup> (DN) T cells and CD3<sup>-</sup>  
131 NKp46<sup>+</sup> cells 1 day and 5 days after inoculation. Whereas no IFN- $\gamma$  production was observed  
132 1 day after inoculation, a significant increase in IFN- $\gamma$ -secreting cells was detected at 5 days  
133 after inoculation in spleen, MLN and PP (**Fig 1A, B and S1A, B Fig**). Up to 10% of CD8<sup>+</sup> T

134 cells and DN T Cells and up to 50% of all NK cells stained IFN- $\gamma$ <sup>+</sup>, particularly following  
135 inoculation with 40 and 100 cysts. Because these mice had never been exposed to apicomplexan  
136 parasites before, these results ruled out antigen-specific responses.

137

138 We also investigated if rapid IFN- $\gamma$  production could be induced by inoculation with tachyzoites  
139 via the i.v. and i.p. routes using a short-term *in vivo* exposure model in which naïve B6 mice  
140 were exposed to *T. gondii* tachyzoites for a maximum of 72 hours. When mice were injected  
141 i.v. or i.p. with 10<sup>5</sup> tachyzoites, no significant IFN- $\gamma$  production could be seen in either spleen,  
142 MLN or PP within 72 hours (**S1E Fig**). However, i.v. or i.p. inoculation with 10<sup>7</sup> tachyzoites  
143 led to secretion of IFN- $\gamma$  by CD3<sup>+</sup>CD8<sup>+</sup>, CD3<sup>+</sup>CD4<sup>-</sup>CD8<sup>-</sup> (DN) T cells and CD3<sup>-</sup>NKp46<sup>+</sup> cells  
144 in spleen, MLN and PP as early as 2-24 hours after inoculation (**Fig 1C, D and S1C, D Fig**),  
145 mirroring the results seen 5 days after a cyst inoculation (**Fig 1B**). Importantly, at 24 hours after  
146 tachyzoite inoculation, levels of other acute inflammatory mediators, such as IL-6, TNF $\alpha$  and  
147 IL-10, were almost indistinguishable from naïve mice (**Fig 1E-G**). These results indicate that  
148 mice were still controlling the infection and that parasite dissemination and subsequent acute  
149 cytokine responses were not yet impacting on protective IFN- $\gamma$  responses 24 hours after i.v.  
150 infection.

151

152 Furthermore, these results show that i.v., i.p. tachyzoite infections and oral brain cyst infections  
153 induce almost identical acute immune responses. *Toxoplasma gondii* cyst production in mice is  
154 a slow and laborious process. In addition, it is difficult to quantify the number of bradyzoites  
155 within brain cysts used for oral infection and, moreover, dissemination patterns following oral  
156 infection are erratic in individual mice [33]. Therefore, we subsequently focused on IFN- $\gamma$   
157 secretion by splenic NK cells 24 hours after i.v. injection of tachyzoites as our primary readout  
158 for further dissection of the underlying mechanistic requirements.

159

160 **Rapid IFN- $\gamma$  secretion in response to *T. gondii* requires IL-12 & IL-18**

161 Whereas the role of IL-12 in IFN- $\gamma$  secretion is well established for *T. gondii* [2], rapid  
162 production of IFN- $\gamma$  in response to other intracellular pathogens, such as *S. enterica*, *L.*  
163 *monocytogenes* and *M. tuberculosis* has also been linked to the upstream effects of IL-18 [28,  
164 29]. To interrogate whether or not, and how early, IFN- $\gamma$  secretion in response to *T. gondii* also  
165 requires IL-18, we exposed naïve B6 mice to *T. gondii* ME49 tachyzoites and treated the  
166 animals with neutralizing monoclonal antibodies (mAb) to IL-12, IL-18 or IL-12 and IL-18  
167 immediately after inoculation. At 24 hours after exposure, IFN- $\gamma$  secretion by NK cells in the  
168 spleen was assessed directly *ex vivo*. Neutralization of IL-12 and IL-18 significantly reduced  
169 IFN- $\gamma$  production, with IL-12 contributing approximately 50% and IL-18 approximately 30-  
170 40% of the response (**Fig 2A**). The significant reduction of rapid IFN- $\gamma$  production in *Il18*<sup>-/-</sup>  
171 mice, and the almost complete absence of rapid IFN- $\gamma$  production in anti-IL-12-treated *Il18*<sup>-/-</sup>  
172 mice, further confirmed a direct correlation between IL-12, IL-18 and IFN- $\gamma$  secretion (**Fig 2C,**  
173 **D**). Consistently, where IL-12 levels in the serum of infected mice peaked at approximately 2  
174 hours after inoculation, the levels of IL-18 mirrored those of IFN- $\gamma$  for up to 72 hours (**Fig 2B**).  
175 Furthermore, treatment with anti-IL-12 and/or anti-IL-18 also reduced concentrations of IFN-  
176  $\gamma$ , IL-12 and IL-18 in the serum of infected mice in an additive manner (**Fig 2D-F**). These results  
177 suggest a hierarchical relationship in which a primary IL-12-driven IFN- $\gamma$  response is followed  
178 by an IL-18-dominant IFN- $\gamma$  response. We concluded that innate IFN- $\gamma$  secretion by CD8<sup>+</sup> T  
179 cells, DN T cells and NK cells in response to *T. gondii* is driven by the secretion of IL-12 and  
180 IL-18.

181

182 **IL-18-driven IFN- $\gamma$  secretion to *T. gondii* depends on multiple redundant inflammasomes**

183 Given that the molecular mechanisms that lead to *T. gondii*-mediated IL-12 secretion are well  
184 characterized, we focused our attention on the host signaling pathways required for IL-18-  
185 driven IFN- $\gamma$  production, using a panel of genetically modified mouse strains. Secretion of

186 bioactive IL-18 depends on the enzymatic cleavage of pro-IL-18 by caspase-1 [23]. Activation  
187 of caspase-1 involves the sensing of danger molecules or stress signals *via* upstream cytosolic  
188 PRRs, so called inflammasomes, a process that can be enhanced and controlled *via* TRIF-  
189 dependent caspase-11 activation. *Caspase1/11*<sup>-/-</sup> double KO mice produced significantly less  
190 IFN- $\gamma$  following injection with *T. gondii* ME49 tachyzoites compared with B6 mice, and this  
191 response could be almost completely prevented by additional anti-IL-12 treatment (**Fig 3A**). As  
192 expected, *Caspase1/11*<sup>-/-</sup> mice did not secrete significant levels of IL-18 following *T. gondii*  
193 inoculation (**Fig 3B**), indicating that the remaining IFN- $\gamma$  response in *Caspase1/11*<sup>-/-</sup> mice is  
194 driven by IL-12. Surprisingly, when we tested mice deficient in the upstream NLR family pyrin  
195 domain-containing proteins 1 and 3 (NLRP1 and NLRP3), NLR molecules that had been  
196 implicated previously in recognition of *T. gondii* [24], both knockout strains secreted  
197 indistinguishable amounts of IL-18 compared with B6 mice (**Fig 3B**). This data suggested a  
198 redundant role for NLRP1 and NLRP3. However, even double knockout and heterozygous  
199 *Nlrp1*<sup>+/-</sup>*Nlrp3*<sup>+/-</sup> mice secreted high levels of IL-18 and IFN- $\gamma$  after exposure to *T. gondii* ME49  
200 tachyzoites (**Fig 3A, B**), suggesting that additional PRR molecules must be involved in sensing  
201 of *T. gondii* invasion *in vivo*. Taken together these results indicate that rapid IFN- $\gamma$  secretion  
202 *in vivo* in response to *T. gondii* depends on the inflammasome  $\rightarrow$  caspase-1  $\rightarrow$  IL-18 axis, and  
203 that *T. gondii* activates at least three different inflammasomes *in vivo*.

204

### 205 ***Toxoplasma gondii* activates inflammasomes in multiple cell types.**

206 To further investigate the role of cytosolic PRRs in sensing *T. gondii* invasion, and to potentially  
207 target inflammasome activation for preventive or therapeutic intervention strategies, we next  
208 tried to identify the *T. gondii*-sensing cell type *in vivo*. To do this, we made use of a red  
209 fluorescent protein (RFP) tagged *T. gondii* ME49 (*T. gondii* ME49-RFP) strain to track parasite  
210 uptake by different immune cell subsets in the spleen. Twenty-four hours after tachyzoite  
211 injection, *T. gondii* ME49-RFP also induced rapid IFN- $\gamma$  secretion by splenic CD3<sup>+</sup>CD4<sup>+</sup>,

212 CD3<sup>+</sup>CD8<sup>+</sup>, CD3<sup>+</sup>CD4<sup>-</sup>CD8<sup>-</sup> (DN) T cells and CD3<sup>-</sup>NKp46<sup>+</sup> cells (**Fig 4A**) and high levels of  
213 serum IL-18 (**Fig 4B**), similar to wild-type *T. gondii* ME49 (see Figs. 1 and 2). Approximately  
214 0.5% of all splenocytes contained *T. gondii* ME49-RFP *in vivo* 24 hours after inoculation (**Fig**  
215 **4C**). Sorted RFP<sup>+</sup> cells secreted significantly more IL-18 *ex vivo* compared to RFP<sup>-</sup> cells (**Fig**  
216 **4D**), and further surface phenotyping revealed that *T. gondii* ME49-RFP was primarily  
217 contained in monocytes, neutrophils and CD8 $\alpha$ <sup>+</sup> dendritic cells (**Fig 4E, F**). Splenic MHC-  
218 II<sup>+</sup>CD11c<sup>+</sup> DCs, CD11b<sup>+</sup>Ly6G<sup>+</sup> neutrophils and CD11b<sup>+</sup>Ly6C<sup>+</sup> monocytes each comprised  
219 approximately 20-30% of all RFP-containing cells after i.v. tachyzoite injection. Only very few  
220 T cells, B cells and macrophages appeared to harbor parasites (**Fig 4E, F**). To investigate if cell  
221 types that contained *T. gondii* ME49-RFP parasites also activated inflammasomes, we  
222 performed intracellular staining for the inflammasome adaptor molecule apoptosis-associated  
223 speck-like protein containing a carboxy-terminal CARD (ASC), and measured the activation of  
224 caspase-1 with a fluorescent inhibitor that only binds to activated caspase-1 (FLICA FAM-  
225 YVAD-FMK) [29]. Consistent with the uptake of *T. gondii* ME49-RFP by different cell types,  
226 *T. gondii* ME49-RFP parasite-harboring neutrophils, monocytes and DCs also expressed higher  
227 levels of ASC and FAM-YVAD compared with RFP<sup>-</sup> cells and FMO controls (**Fig 4G**).  
228 Collectively, these results indicate that *T. gondii* infection activates multiple redundant  
229 inflammasomes in multiple different hematopoietic cell-types *in vivo*.

230

### 231 **IL-18-driven IFN- $\gamma$ secretion to *T. gondii* depends on parasite invasion but is independent** 232 **of secreted GRA proteins**

233 Next, we assessed if rapid IFN- $\gamma$  secretion in response to *T. gondii* required active parasite  
234 invasion or could be induced by soluble factors. To this end, naïve B6 mice were injected with  
235 either live, heat-killed or sonicated *T. gondii* ME49 tachyzoites. Only inoculation with live  
236 parasites induced IFN- $\gamma$  secretion and increased serum IL-18 levels (**Fig 5A, B**). To exclude  
237 the possibility that heat inactivation and sonication destroyed soluble factors that could

238 potentially drive this response, we also injected naïve B6 mice with HFF cell debris, which had  
239 been re-suspended in the *T. gondii* ME49 culture supernatant. This treatment also failed to  
240 induce IFN- $\gamma$  and IL-18 secretion (**Fig 5A, B**). These results indicated that active parasite  
241 invasion is required to initiate an IFN- $\gamma$  response, suggesting that *T. gondii* virulence factors  
242 may play a critical role. Evidence from studies that have investigated the mechanistic  
243 framework of how intracellular bacterial pathogens activate inflammasomes *in vivo*, suggests  
244 that secreted effector molecules and/or distinct structural proteins are critically required [34].  
245 Apicomplexan parasites also secrete effector molecules with distinct host-modulatory  
246 properties [35]. In particular, dense granule (GRA) proteins have been shown to play important  
247 roles in the maintenance of the parasitophorous vacuole (PCV), for the intracellular lifestyle  
248 and to exert host-modulatory functions [36]. We further probed the parasite-derived factors  
249 that might drive early, IL-18-dependent IFN- $\gamma$  secretion by exposing naïve B6 mice to a panel  
250 of *T. gondii* strains to test if GRA proteins are required for IL-18-driven IFN- $\gamma$  secretion. Hence,  
251 we infected mice with a mutant strain of *T. gondii* ME49 that lacks ASP5, a critical requirement  
252 for secretion of GRA proteins [37], as well as strains lacking GRA20 or GRA23, two proteins  
253 that contain the PEXEL motif required for PCV exit. No significant difference in the levels of  
254 serum IL-18 and NK cell-produced IFN- $\gamma$  was observed 24 and 48 hours after inoculation with  
255 *T. gondii* ME49 ASP5-deficient tachyzoites compared with inoculation of a wildtype *T. gondii*  
256 ME49 (**Fig 5C, D**), suggesting that ASP5-driven GRA export is dispensable for inflammasome  
257 activation. Similarly, inoculation with GRA20-deficient or GRA23-deficient parasites did not  
258 significantly reduce IFN- $\gamma$  secretion in the absence of IL-12 (**S2A Fig**). We also tested another  
259 Type II *T. gondii* strain, DEG (*T. gondii* DEG), which had been implicated in reduced IL-1 $\beta$   
260 secretion following *in vitro* infection of macrophages [24] but, similar to inoculation with *T.*  
261 *gondii* ME49 ASP5-deficient parasites, inoculation with *T. gondii* DEG did not lead to reduced  
262 levels of serum IL-18 and NK cell-produced IFN- $\gamma$  in this model (**Fig 5C, D**). At 48 hours after  
263 tachyzoite inoculation, the levels of serum IL-18 were even significantly higher compared with



264 inoculation of *T. gondii* ME49 (**Fig 5D**). These data indicate that ASP5-dependent secretion of  
265 GRA proteins does not affect IL-18-driven IFN- $\gamma$  secretion and highlights the diverging  
266 mechanisms that underlie *in vitro* IL-1 $\beta$  and *in vivo* IL-18 secretion in response to *T. gondii*.

267

### 268 **IL2C treatment expands IL-18-responsive IFN- $\gamma$ -secreting cell subsets**

269 Collectively, the results presented so-far raise the prospect that, if the ability of non-CD4 cells  
270 to invoke inflammasome-dependent, IL18-driven production of IFN- $\gamma$  can be enhanced, it may  
271 be possible to control acute toxoplasmosis in AIDS. Hence, we investigated if targeted  
272 expansion of non-CD4 cells with IL2C treatment can achieve this. First, naïve mice were treated  
273 i.p. with IL2C complex on four consecutive days (**Fig 6A**) and, 24 hours after the last IL2C  
274 injection, immune cell expansion was assessed by flow cytometry relative to untreated animals.  
275 As reported previously [38], IL2C treatment led to a significant expansion of memory CD8<sup>+</sup> T  
276 cells, NK cells and DN T cells in spleen and MLN (**Fig 6B, C**) and to a minor increase in the  
277 Peyer's Patches (PP) (**Fig 6D**). To further assess if IL2C-expanded and non-expanded CD8<sup>+</sup> T  
278 cells, DN T cells and NK cells responded similarly to *T. gondii* infection, IL2C-treated and  
279 untreated mice were infected with 10<sup>7</sup> ME49 tachyzoites for 24 hours (**Fig 6A**). The percentage  
280 of CD8<sup>+</sup> T cells, DN T cells and NK cells producing IFN- $\gamma$  was almost indistinguishable  
281 between IL2C-treated and untreated mice (**Fig 6E**; data for CD8<sup>+</sup> T cells and DN T cells not  
282 shown). The number of IFN- $\gamma$ <sup>+</sup> NK cells (**Fig 6F**), IFN- $\gamma$ <sup>+</sup> CD8<sup>+</sup> T cells and IFN- $\gamma$ <sup>+</sup> DN T cells  
283 (**S3A Fig**) increased 3-30 fold following IL2C treatment. Similarly, IL2C pretreatment  
284 significantly increased systemic IFN- $\gamma$  levels in the serum after i.v. infection (**Fig 6G**), but as  
285 expected did not lead to a significant change in the levels of upstream serum IL-18 (**S3b Fig**).  
286 We also assessed the expression of IL18R and IL12R on the surface of IFN- $\gamma$ <sup>+</sup> and IFN- $\gamma$ <sup>-</sup> cells.  
287 IFN- $\gamma$ <sup>+</sup> NK cells (data for CD8<sup>+</sup> T cells and DN T cells not shown) expressed significant higher  
288 levels of IL18R and IL12R compared to IFN- $\gamma$ <sup>-</sup> NK cells (**Fig 6H, I**). Taken together, these  
289 results show that IL2C-expanded cells respond identically to non-expanded cells and that IL2C



290 treatment numerically expands IFN- $\gamma$  producing cells that maintain a higher IL18R level  
291 expression compared to IFN- $\gamma$  cells.

292

293 **IL2C pre-treatment protects mice from acute lethal toxoplasmosis independently of T<sub>Reg</sub>**  
294 **expansion and parasite burden**

295 To definitively assess if IL2C-mediated expansion of IL-18-responsive IFN- $\gamma$ -secreting non-  
296 CD4 cell subsets can prevent lethal toxoplasmosis in mice, we used the well-established oral  
297 inoculation model with *T. gondii* ME49 bradyzoite-containing brain cysts. As above, naïve B6  
298 mice were treated i.p. with IL2C for four consecutive days (**Fig 7A**). IL2C treatment was  
299 accompanied by a weight loss from which mice recovered within a few days (data not shown).  
300 Forty-eight hours after the last IL2C treatment, mice were inoculated orally with 10 or 40 *T.*  
301 *gondii* ME49 cysts and were assessed for weight loss and survival over 60 days. All mice that  
302 had been inoculated with 40 cysts and 87% of mice that had been inoculated with 10 cysts, but  
303 had not received IL2C injections, succumbed within 14 days after inoculation (**Fig 7B, C**). In  
304 contrast, IL2C pre-treatment extended survival in mice that had been inoculated with 40 cysts  
305 up to 36 days, and approximately 40% of mice that had been inoculated with 10 cysts survived  
306 until day 60 (**Fig 7B, C**).

307

308 Importantly, depletion of NK cells, CD8<sup>+</sup> T cells, Thy1.2<sup>+</sup> cells (expressed on all T cells and  
309 immature NK cells [39]) or IFN- $\gamma$  from mice that had been treated with IL2C for four days and  
310 had been inoculated with 10 *T. gondii* ME49 cysts with neutralizing antibodies reversed IL2C-  
311 mediated increase in survival (**Fig 7D, E**), indicating that IL2C-mediated cell expansion directly  
312 correlated with increased survival. Similarly, neutralization of IL-18, IL-12 or IFN- $\gamma$ , reversed  
313 the protective phenotype (**Fig 7D, F**). All mice that were not treated with IL2C succumbed to  
314 the infection by day 16, with a median survival of 11 days (**Fig 7F**). Whilst 67% of IL2C-treated  
315 mice that received control rat IgG survived until day 60, the median survival for mice treated

316 with anti-IFN- $\gamma$  was 10.5 days, 13 days for mice treated with anti-IL-12 and 14 days for mice  
317 treated with anti-IL-18 (**Fig 7F**). All mice that survived until day 60 were assessed for *T. gondii*  
318 brain cysts. Mice contained 100 - 200 cysts per brain (data not shown), indicating that all mice  
319 were infected and that survival was not due to a failure of the infection to establish. Taken  
320 together, these results further substantiate the proposal that IL2C pre-treatment protects mice  
321 from lethal toxoplasmosis *via* IL-12- and IL-18-driven IFN- $\gamma$  secretion.

322

323 To assess if IL2C pre-treatment also impacts on measurable disease parameters other than  
324 survival, we also analyzed parasite burden and immunopathology at 2, 4 and 9 days following  
325 oral cyst infection. Due to the low infectious dose of 10 cysts, only minimal changes in  
326 immunopathology were observed at 2 and 4 days after infection in all groups (data not shown).  
327 At 9 days after infection, IL2C pre-treated mice displayed significantly reduced gross pathology  
328 of gut and liver (**Fig 7G, H**) in the absence of any effect on parasite burden (**Fig 7I**). T<sub>Reg</sub>  
329 numbers in MLN and lamina propria (LP) were not increased after IL2C injections (**Fig 7J, K,**  
330 **L**) suggesting a role for IL2C pre-treatment independent of the previously reported T<sub>Reg</sub>  
331 expansion with JES6-1A12-containing IL2C [40, 41]. Collectively, these results demonstrate  
332 a protective role of IL2C pre-treatment in acute lethal murine toxoplasmosis.

333

## 334 **DISCUSSION**

335 Non-CD4 cells, such as CD8<sup>+</sup> T cells, DN T cells and NK cells, have been implicated in early  
336 control of severe infections with intracellular pathogens, including *T. gondii*, *M. tuberculosis*  
337 and *Salmonella* [2, 29]. Our study provides a comprehensive mechanistic framework for how  
338 *T. gondii* activates IFN- $\gamma$  secretion by protective CD8<sup>+</sup> T cells, DN T cells and NK cells. In  
339 particular, we demonstrate that IL-18-driven IFN- $\gamma$  secretion *in vivo* requires the activation of  
340 at least three different inflammasomes; because only *Caspase1/11*<sup>-/-</sup> mice but not *Nlrp1*<sup>-/-</sup>,  
341 *Nlrp3*<sup>-/-</sup> and *Nlrp1*<sup>±/±</sup>*Nlrp3*<sup>±/±</sup> mice were devoid of circulating IL-18 after *T. gondii* infection, a

342 third sensor must exist in addition to NLRP1 and NLRP3 [24, 42]. Furthermore, we show that  
343 inflammasome activation occurred in CD8 $\alpha^+$  DCs, inflammatory monocytes and neutrophils,  
344 cell types that have also been implicated in IL-12 secretion in response to *T. gondii* [2]. These  
345 results imply a high level of redundancy in the cell type that senses *T. gondii* infection as well  
346 as in the host inflammasome signaling pathway. This is in contrast to the often very specific  
347 recognition of viral and bacterial infections by one particular inflammasome in a distinct cell  
348 type [28, 29, 43-46]. It is likely that this divergence highlights the evolutionary complexity of  
349 parasites and suggests that more highly evolved organisms have developed a more complex  
350 inflammasome-dependent interplay with their hosts. In line with this hypothesis, it was shown  
351 recently *in vitro* that *T. gondii* also activates the NLRC4 and AIM2 inflammasomes in human  
352 fetal small epithelial cells [47], as well as the expression of NLRP6, NLRP8 and NLRP13 in  
353 THP-1 macrophages [48]. Due to the diverse expression of different internalization receptors  
354 and the abundance of inflammasome components, various myeloid cells seem to be endowed  
355 with unique abilities to interact with *T. gondii*. In this context the characterization of the  
356 myeloid cell populations which produce IL-18 may foster innovative strategies for *T. gondii*  
357 interventions.

358

359 *Toxoplasma gondii* appears to activate both NLRP1 and NLRP3 [24], yet the specificity of this  
360 activation remains elusive. While the activation of NLRP3 in response to *T. gondii* appears to  
361 be influenced by P<sub>2</sub>X<sub>7</sub> receptor-dependent potassium efflux and the induction of reactive  
362 oxygen species [47, 49-51], the exact mechanisms of how *T. gondii* activates multiple  
363 inflammasomes remain enigmatic. In this context it is also interesting to note that *in vitro*  
364 infection of mouse macrophages and human monocytes with *T. gondii* only leads to the  
365 secretion of IL-1 $\beta$ , but not IL-18 [24, 52]. In contrast, *in vivo* infection in mice leads to  
366 significant secretion of IL-18 but not IL-1 $\beta$  [24]. It has even been suggested that *in vitro*  
367 infection of human neutrophils leads to evasion of NLRP3 activation and IL-1 $\beta$  secretion [53].

368 Furthermore, *in vitro* activation of inflammasomes differs between *T. gondii* strains, and is  
369 predominantly induced by Type II parasites [24]. These findings suggest that *T. gondii* has  
370 evolved sophisticated diverging effector mechanisms to manipulate inflammasome biology in  
371 different host cell subsets, and suggest that secreted effector molecules and/or distinct structural  
372 proteins may underlie inflammasome activation. It is, therefore, interesting that *Nlrp1*<sup>±/±</sup>/*Nlrp3*<sup>±/±</sup>  
373 mice did not show reduced IL-18 secretion after infection with *T. gondii*. It is important to note  
374 that in mice the *Nlrp1* locus is on the same chromosome as the *Nlrp3* gene, meaning that the  
375 generation of rare double knockout offspring relies on recombination rather than inheritance. It  
376 will therefore be important to further investigate the role of *Nlrp1* and 3 with alternative  
377 methods, such as CRISPR/Cas9 and/or chemical inhibition.

378

379 Our study has ruled out ASP5-dependent GRA proteins [54], the most abundant family of *T.*  
380 *gondii*-derived effector molecules [35], as the primary activator of inflammasomes. GRA  
381 molecules influence several host cell pathways [55] and are required for the transport of small  
382 molecules across the parasitophorous vacuole [56]. These results do not exclude GRA proteins  
383 that don't depend on ASP5 for export, and further studies will have to investigate the role of  
384 ASP5-independent GRA proteins as well as rhoptry proteins and other surface structures in  
385 driving this process. In particular, the recently described MYR1 protein export system [57-59]  
386 may be valuable in answering if secreted effector molecules are at all required to initiate  
387 inflammasome activation.

388

389 It is tempting to speculate that the overall purpose of activating multiple inflammasomes in  
390 multiple cell types is to drive an inflammatory host response that mediates the progression of  
391 *T. gondii* into the chronic cyst phase, while at the same time preventing activation of parasite-  
392 killing mechanisms. *Toxoplasma* can invade and replicate in virtually all nucleated cell types  
393 of warm-blooded animals. From an evolutionary perspective, it is not surprising that the arms

394 race between the host and the parasite has led to the evolution of numerous strategies to activate  
395 the immune system (from the parasite's perspective) and to sense the invasion (from the host's  
396 perspective). The fundamental differences between the habitats and the composition of the  
397 immune system of susceptible warm-blooded host species may require *T. gondii* to activate as  
398 many different inflammasome sensors as possible. It is well established that *T. gondii* requires  
399 a pro-inflammatory, IFN- $\gamma$ -dominated immune response to form cysts [7]. Because  
400 transmission is critical for the parasite's survival and completion of the life cycle, it is  
401 maladaptive for *T. gondii* to kill its host. This may explain why IFN- $\gamma$  neutralization is fatal,  
402 because IFN- $\gamma$  deficiency favors tachyzoite replication and prevents cyst formation.  
403 Furthermore, these findings may also explain why *T. gondii* cysts reactivate after HIV co-  
404 infection in humans; HIV destroys CD4<sup>+</sup> T cells, a prime IFN- $\gamma$  producer. Hence, we reasoned  
405 that a viable adjunct therapy in *T. gondii*/HIV co-infection might be achieved by boosting IFN-  
406  $\gamma$ -producing CD8<sup>+</sup> T cells, DN T cells and NK cells to prevent acute toxoplasmosis.

407

408 The development, maturation and maintenance of IL-18 responsive NK cells, CD8<sup>+</sup> memory T  
409 cells and DN T cells relies on IL-2 and IL-15 [60-65]. While the role of IL-15 in immunity to  
410 *T. gondii* remains controversial [66, 67], IL-2 deficient mice are highly susceptible to *T. gondii*  
411 infection [68], and administration of recombinant IL-2 enhances survival of *Toxoplasma*-  
412 infected mice [69, 70]. The activity of these cytokines is mediated through trans-presentation,  
413 a mechanism by which the cytokine is presented to the cytokine receptor complex beta and  
414 common  $\gamma$  chains in the context of cell-bound high-affinity alpha ( $\alpha$ ) chains of the cytokine  
415 receptor [71, 72]. Consequently, complexing IL-2 with anti-IL-2 (IL2C) or IL-15 with IL-  
416 15R $\alpha$ Fc (IL15C) significantly enhances the biological activity of these cytokines *in vivo* [31,  
417 73]. Importantly, the binding site of the anti-IL2 clone used in the IL2C determines whether a  
418 preferential expansion of regulatory T cells (T<sub>Reg</sub>; anti-IL-2 clone JES6-1A12) or CD8<sup>+</sup> T cell,  
419 NK cells and DN T cells occurs (anti-IL-2 clone S4B6) [31, 74].

420

421 Using JES6-1A12-containing IL2C, Akbar *et al.* [41] showed that selective expansion of T<sub>Reg</sub>  
422 cells in Type I *T. gondii* RH-infected animals improved control of the parasite. It was also  
423 demonstrated that T<sub>Reg</sub> expansion with JES6-1A12-containing IL2C can overcome the  
424 competition for bioavailable IL-2 by regulatory and effector T cells, leading to reduced  
425 immunopathology and morbidity during acute Type II *T. gondii* ME49 infection [40]. These  
426 studies are in line with other reports showing a collapse of T<sub>Reg</sub> cells during acute *T. gondii*  
427 infection due to IL-2 starvation and an overall protective role of T<sub>Regs</sub> in acute *T. gondii*-  
428 mediated immunopathogenesis [75-78]. In contrast to JES6-1A12-containing IL2C, S4B6-  
429 containing IL2C has been shown to boost NK cell and memory CD8<sup>+</sup> T cell numbers in mice  
430 and to enhance their cytolytic capacity against viral infections, malaria [79] and cancer cells  
431 [71, 80-82]. Short-term exposure of naïve mice to IL2C containing S4B6 has also been shown  
432 to enhance resistance and immunity against *Listeria monocytogenes* infection [83]. Our study  
433 is the first to show a protective effect of S4B6-containing IL2C pre-treatment in toxoplasmosis  
434 and our results suggest that IL2C pre-treatment can protect mice from lethal toxoplasmosis via  
435 distinct mechanisms, depending on the IL-2 mAb clone used to prepare the cytokine complex.  
436 Thus, JES6-1A12-containing IL2C seems to compensate for the limited bioavailability of IL-2  
437 for Treg survival during acute *T. gondii* infection, leading to reduced immunopathology,  
438 whereas S4B6-containing IL2C, whilst also reducing pathology without affecting parasite  
439 burden, does so in a Treg-independent manner. Thus, S4B6-containing IL2C seems to favor  
440 survival and expansion of IL-18-driven IFN- $\gamma$  secretion, possibly driving parasites towards  
441 stage conversion and cyst formation. It is, hence, tempting to speculate that both types of  
442 complex could have a synergistic effect if applied together.

443

444 Cytokine complex-mediated immunotherapy has not only attracted attention in models of  
445 infectious diseases but also in the cancer field [84]. IL2C treatment reduces viral load in a mouse

446 model of gamma-herpesvirus infection [85] and impacts positively on mouse melanoma [86]  
447 and BCL1 leukemia [87]. More recently, IL2C treatment has also been tested successfully in  
448 cancer models in combination with immune checkpoint blockade [88]. IL-15/IL-15R $\alpha$ -Fc  
449 complexes (IL15C) have also been shown to expand CD8<sup>+</sup> T cell, DN T cell and NK cell  
450 populations, and to protect mice against cerebral malaria via the induction of IL-10-producing  
451 NK cells [79]. Whether IL15C would also be protective in our model of lethal toxoplasmosis  
452 remains to be investigated. Taken together, these results suggest that cytokine complex  
453 treatment may be a more broadly applicable adjunct therapy in infectious diseases, but also  
454 highlight that the protective mechanisms may differ between different pathogens and cytokine  
455 complex types used. To our knowledge, no data are available yet on any clinical use of IL2C  
456 and IL15C in humans. It will be important to consider the hyper-inflammatory response that  
457 can be attributed to IL2C and IL15C treatment and, hence, careful consideration should be taken  
458 before using cytokine complexes clinically in the context of toxoplasmosis.

459

460 In summary, here we delineate the mechanistic framework of how IFN- $\gamma$  is produced by non-  
461 CD4 cell types *in vivo* in response to *T. gondii*, including a crucial role for parasite viability,  
462 active invasion and inflammasome-dependent IL-18 secretion. We demonstrate that *in vivo*  
463 inflammasome activation in response to *T. gondii* occurs in multiple myeloid cell types and  
464 involves at least three different redundant inflammasomes. Additionally, our study excludes *T.*  
465 *gondii*-derived, ASP5-dependent, dense granule proteins as the main activators of  
466 inflammasomes *in vivo*. The observation that both IL-12 and IL-18 neutralization reverses the  
467 host protective role of CD8<sup>+</sup> T cells, DN T cells and NK cell-produced IFN- $\gamma$  during *T. gondii*  
468 infection highlights the redundancy and functional interchangeability of both cytokines during  
469 *T. gondii* infection. This combination of observations led us to the hypothesis that enhancement  
470 of inflammasome-dependent, IL18-driven production of IFN- $\gamma$  by non-CD4 cells may be a  
471 route to control acute toxoplasmosis in AIDS. Consequently, we provide compelling evidence



472 for a protective role of IL2C pre-treatment in lethal toxoplasmosis. We demonstrate that IL2C-  
473 mediated expansion of CD8<sup>+</sup> T cells, NK cells and DN T cells protects mice against acute  
474 disease and death in an IFN- $\gamma$ -dependent manner. Hence, we conclude that inducing immune  
475 responses that lead to the expansion of CD8<sup>+</sup> T cells, DN T cells and NK cells in combination  
476 with inflammasome-dependent, IL-18-driven IFN- $\gamma$  secretion could be a crucial feature of  
477 improved toxoplasmosis intervention strategies, particularly in the context of HIV co-infection.

478

## 479 **Materials and Methods**

### 480 **Mice**

481 C57BL/6J and Arc(S) mice were purchased from the Animal Resource Center (Perth,  
482 Australia). Knockout mice (*Caspase1/11*<sup>-/-</sup>, *Nlrp1*<sup>-/-</sup>, *Nlrp3*<sup>-/-</sup> and *Il18*<sup>-/-</sup>) were bred and  
483 maintained at the Australian Institute of Tropical Health and Medicine, James Cook University,  
484 Cairns and Townsville, Australia. Double knockout mice (*Nlrp1*<sup>-/-</sup>*Nlrp3*<sup>-/-</sup>) mice were bred by  
485 sequentially crossing *Nlrp1*<sup>-/-</sup> [89] and *Nlrp3*<sup>-/-</sup> mice. Genotyping was performed using the  
486 following primer pairs: *Nlrp3*-F 5'-GCTCAGGACATACGTCTGGA-3'; *Nlrp3*-R 5'-  
487 TGAGGTCCACATCTTCAAGG-3'; *Nlrp3*-R2 5'-TTGTAGTTGCCGTCGTCGTCCTT-3';  
488 *Nlrp1* WT: *Nalp1aF* 5'-TGGAAGGAAGGCAAGCTTTA-3'; *Nalp1aR* 5'-  
489 ACCCAGGGAAGTTCACACAG-3'; *Nlrp1* mutant: *Nalp1aF* 5'-  
490 TTTAGAGCTTGACGGGGAAA-3'; *Nalp1aR* 5'-GGAAGGACTTCCCACCCTAA-3'. The  
491 following mice were used for experiments: *Nlrp1*<sup>-/-</sup>*Nlrp3*<sup>-/-</sup>, *Nlrp1*<sup>+/-</sup>*Nlrp3*<sup>-/-</sup> and *Nlrp1*<sup>-/-</sup>*Nlrp3*<sup>+/-</sup>  
492 . For infection experiments, all mice were sex- and age-matched, and kept in our BSL 2 animal  
493 facility under specific pathogen-free (SPF) conditions.

494

### 495 **Parasites**

496 Type II *T. gondii* strains ME49, ME49-RFP, ME49 GRA20-deficient, ME49 GRA23-deficient,  
497 ME49 ASP5-deficient and DEG (ATCC, ATC50855) were maintained by continuous passage



498 in human foreskin fibroblasts (HFF; ATCC, ATCSCRC1041) in DMEM supplemented with  
499 10% FCS, penicillin, streptomycin and L-glutamine at 37°C and 5% CO<sub>2</sub>. Parasites were  
500 harvested from recently lysed cell monolayers, passed through a 26G needle and a 3 µm TSTP  
501 Isopore™ membrane filter and concentrated by centrifugation at 500g for 10 minutes. The  
502 pellet of tachyzoites was re-suspended in sterile PBS. Parasites were counted using a Neubauer  
503 hemocytometer and diluted to the required infectious dose in sterile PBS.

504

### 505 **Generation of *T. gondii* ME49 *Gra20* and *Gra23* knockouts**

506 We employed a CRISPR/Cas9 approach to insert frameshifts within the first 20 nt of the start  
507 of the coding sequence of *gra20* and *gra23* in *T. gondii* Me49 with consequential disruption of  
508 the final translated proteins. Inverse PCR was used to exchange the sgRNA of UPRT with the  
509 sgRNA for GRA20 with Ph-sgRNA\_TgGRA20mutF (5'-  
510 ATGCATAGCCGGAAGTGCCTGTTTTAGAGCTAGAAATAGC-3') and Ph-genCas9mutR  
511 (5'-AACTTGACATCCCCATTTAC-3') to yield plasmid pCAS9sgGRA20. Similarly, inverse  
512 PCR was used to exchange the sgRNA of UPRT with the sgRNA for GRA23 with Ph-  
513 sgRNA\_TgGRA23mutF (5'-  
514 GCAGCGCGTGCGGGAAGCAGGTTTTAGAGCTAGAAATAGC-3') and Ph-  
515 genCas9mutR (5'-AACTTGACATCCCCATTTAC-3') to yield plasmid pCAS9sgGRA23.  
516 Transfection of *T. gondii* Me49 was carried out as described previously [90]. Twenty-four hours  
517 post-transfection, transiently transfected GFP<sup>+</sup> parasites were purified by flow cytometry as  
518 previously described [91] and individual GRA20 and GRA23 KO clones were further purified  
519 using two rounds of limiting dilution cloning. Sanger sequencing of PCR products was used to  
520 confirm disruption of the *gra20* and *gra23* ORFs.

521

### 522 **Infections**

523 To isolate *T. gondii* ME49 bradyzoite containing cysts, the brains of chronically infected Arc(S)  
524 mice (injected i.p. with 500 tachyzoites of *T. gondii* ME49 >8 weeks prior) were removed,  
525 homogenized in sterile PBS, and subjected to centrifugation in a discontinuous Percoll gradient.  
526 Cysts were counted using a Neubauer hemocytometer and diluted in sterile PBS. For  
527 experiments, B6 mice were inoculated with 10, 40 or 100 cysts by oral inoculation. For  
528 mechanistic studies, B6 mice were injected i.v. in the lateral tail vein with  $10^7$  tachyzoites of *T.*  
529 *gondii* ME49, mutant strains on the *T. gondii* ME49 background or the Type II strain *T. gondii*  
530 DEG in a volume of 200  $\mu$ l. For heat inactivation, *T. gondii* ME49 tachyzoites were grown as  
531 described above, enumerated, and washed twice with PBS before incubation at 62° C in a water  
532 bath for 1 hour. Effective killing was verified by addition of heat-killed parasites to a HFF cell  
533 monolayer.

534

### 535 **Isolation of leukocytes**

536 Spleens, mesenteric lymph nodes and Peyer's Patches were extracted and mechanically  
537 disrupted by pushing cells through a 70  $\mu$ m cell strainer. Subsequently, red-cell depleted,  
538 single-cell suspensions were prepared as described elsewhere [39]. Lamina propria cells were  
539 isolated from the ileum as published previously with minor modifications [92].

540

### 541 **Scoring of pathology**

542 Gross pathology of ileum and liver was scored visually using a scoring system adapted from  
543 Melgar et al. [93]. For the ileum, the consistency of the intestinal contents, the degree of  
544 swelling and amount of angiogenesis were assessed. This system is based on an ascending scale  
545 of severity, for each parameter, as follows: 0 (no abnormality); 1 (minimal); 2 (moderate); or 3  
546 (severe). For the liver, the colour and appearance of the organ were assessed on an ascending  
547 scale of severity from 0 (normal colour and appearance); 1 (blotchy appearance with some areas  
548 exhibiting change in colour); 2 (entire organ pale in colour); or 3 (entire organ pale in colour

549 with visible signs of necrosis). Scores for each parameter were added together to give a total  
550 score for each animal.

551

## 552 **Parasite burden**

553 Parasite burden was measured in the whole spleen of individual mice using a microtitre dilution  
554 method adapted from Buffet et al. [94] It was necessary to determine parasite burden in the  
555 spleen rather than the intestine because it was impossible to harvest immune cells for analysis  
556 from the intestine and determine parasite burden in the same animal; however, we have  
557 demonstrated previously that the parasite burden in the spleen accurately mirrors that in the  
558 intestine [50]. Briefly, prior to the experiment, 96 well plates were seeded with HFF cells and  
559 allowed to become confluent. One row was allocated per mouse and each mouse was done in  
560 duplicate. Spleens were removed and single-cell suspensions were made by passing through a  
561 70- $\mu$ m cell strainer. Cells were pelleted at 1500g, and then resuspended in RPMI 1640  
562 containing 5% FCS at a concentration of  $1 \times 10^7$  cells/ml. Two hundred microliters of spleen cell  
563 suspension was added to the first well of a 96-well plate and then serially diluted 1/2 across the  
564 plate. Plates were incubated at 37°C in 5% CO<sub>2</sub> for 7 days before wells were examined for the  
565 presence of parasites. A score of parasite burden was allocated based on the last column in  
566 which parasites were visible.

567

## 568 **Flow cytometry**

569 To assess expression of surface antigens and IFN- $\gamma$  secretion, viable, red blood cell-depleted  
570 single-cell suspensions were stained with monoclonal antibodies (all from BD Pharmingen)  
571 against CD4 (clone GK1.5), CD8 $\alpha$  (clone 53-6.7), CD3 (clone 145-2C11), NKp46 (clone  
572 29A1.4), CD44 (clone 1M7), CD90.1 (clone 30-H12), CD11b (clone M1/70), CD11c (clone  
573 HL3), MHC-II (clone M5/114), CD11b ( clone M1/70), Ly6G (clone 1A8), Ly6C (clone AL-  
574 21), CD19 (clone 1D3), F4/80 (clone BM8), or IFN- $\gamma$  detection antibody (Miltenyi Biotec,

575 Germany). After washing the cells, samples were analyzed using a FACSCantoII or  
576 FortessaX20 analyzers (BD Biosciences, CA). Propidium iodide (2 µg/ml) was added to  
577 exclude dead cells.

578

#### 579 **Assessment of *ex vivo* IFN- $\gamma$ secretion**

580 *Ex vivo* IFN- $\gamma$  secretion by distinct lymphocyte subsets was assessed as described previously  
581 [29]. Briefly, mice were injected i.v., i.p., or p.o. with different doses of *T. gondii* ME49 cysts  
582 or tachyzoites (as described in figure legends). At different time points after injection of  
583 parasites (as described in figure legends), organs were removed aseptically, single cell  
584 suspensions were prepared and red blood cells were lysed. Cells ( $10^6$ ) were stained with the  
585 ‘Mouse IFN- $\gamma$  secretion assay detection kit’ (Miltenyi Biotec, Germany) according to the  
586 manufacturer’s instructions and IFN- $\gamma$  secretion was analyzed by flow cytometry.

587

#### 588 **Detection of *in vivo* inflammasome activation by flow cytometry**

589 Detection of apoptosis-associated speck-like protein containing a caspase recruitment domain  
590 (ASC) assembly was performed as described previously [95]. Briefly, mice were injected with  
591  $10^7$  *T. gondii* ME49-RFP tachyzoites and euthanased 24 hours later. Cells were stained for  
592 surface molecules, fixed, permeabilized and stained with rabbit anti-ASC antibody (Santa Cruz  
593 Biotechnology) for 45 min at room temperature. Subsequently, a secondary anti-rabbit  
594 Alexa488 antibody (Life Technologies) was added for 45 min at room temperature. A FMO  
595 control without anti-goat Alexa488 was included.

596

597 Detection of active caspase-1 by flow cytometry was performed using the carboxyfluorescein  
598 FLICA kit (FAM-YVAD-FMK, Immunochemistry Techniques, Bloomington, MN). B6 mice  
599 were injected with  $10^7$  *T. gondii* ME49-RFP tachyzoites and 23 hours later FAM-YVAD-FMK  
600 (diluted in DMSO and PBS) was injected intravenously. Splenic cells were analyzed by FACS

601 1 hour later as described above (24 hours after *T. gondii* ME49-RFP injection). Mice that  
602 received *T. gondii* ME49-RFP but no FAM-YVAD-FMK were used as FMO control. RFP<sup>+</sup>  
603 cells were analyzed for expression of cell specific surface markers and positivity in green  
604 fluorescence.

605

## 606 **Multiplex and ELISA**

607 Blood for serum analysis was taken post mortem from the aorta abdominalis and collected in  
608 serum separator tubes (BD), left for 30 minutes at room temperature, followed by centrifugation  
609 at 12,000g for 3 min. Sera were stored at -20°C until analysis. Measurements were performed  
610 using CBA (BD Biosciences, CA) or ELISA (elisakit.com, Australia) according to  
611 manufacturers' instructions. Samples were acquired on a FACSCantoII (BC Biosciences, CA)  
612 or a FLUOstar Omega ELISA Reader (BMG Labtech).

613

## 614 **IL-2/anti-IL-2 complex-mediated cell expansion**

615 IL-2/anti-IL-2 complexes (IL2C) were prepared as described previously [38]. Briefly, 1.5 µg  
616 of recombinant mouse IL-2 (Peprotech) and 10 µg of anti-IL-2 mAb (clone S4B6, Walter and  
617 Eliza Hall Institute [WEHI] antibody facility, Melbourne, Australia) were mixed, incubated at  
618 37°C for 30 min, and administered i.p. in a volume of 200 µl for four consecutive days.

619

## 620 **Antibody-mediated cell depletion and cytokine neutralization**

621 For cytokine neutralization and cell depletion, monoclonal antibodies against IL-12, IL-18,  
622 IFN-γ, CD8, NK1.1, Thy1.2 and rat IgG were purchased from the WEHI antibody facility or  
623 from BioXCell (NH, USA). A total of 200 µg of anti-IL-18 (clone YIGIF74-1G7; Cat. No.:  
624 BE0237), anti-IFN-γ (clone HB170-15), anti-IL12 (clone C17.8), anti-NK1.1 (clone PK136),  
625 anti-CD8 (clone 2.43), anti-Thy1.2 (clone 30H12) or control rat IgG were injected i.p. weekly  
626 in a volume of 200 µl.

627

628 **Statistics**

629 Flow cytometry data were analyzed using FlowJo software (Treestar, CA) and statistical  
630 analysis was performed using GraphPad Prism, GraphPad software, San Diego, CA as indicated  
631 in individual figure legends. One-way analysis of variance (ANOVA) was followed by  
632 Dunnett's multiple comparison test, and two-tailed Student's *t* tests were used. A Log-rank  
633 (Mantel-Cox) test was used to compare significance for survival experiments. A P value of less  
634 than 0.05 was considered significant.

635

636 **Ethics Statement**

637 All experiments were approved and conducted according to Australian animal protection law  
638 and in accordance with requirements of the Animal Ethics Committee of James Cook  
639 University (A2138, A2324). Death was never used as an endpoint.

640

641

## 642 **Acknowledgments**

643 This work was supported by the National Health and Medical Research Council of Australia  
644 (NHMRC) through a CJ Martin Biomedical Early Career Fellowship (APP1052764) and a  
645 Career Development Level 1 Fellowship (APP1140709) to A.K. A.K and C.M.M. also  
646 acknowledge support through a Capacity Building Grant (15031) provided by the Australian  
647 Institute of Tropical Health and Medicine (AITHM) *via* the Queensland Government. We thank  
648 Michael E. Grigg (NIH, USA) for generously providing the *T. gondii* ME49-RFP, and Seth  
649 Masters (WEHI, Melbourne, Australia) for providing *Nlrp1*<sup>-/-</sup> and *Nlrp3*<sup>-/-</sup> mice. We are grateful  
650 to Dominique Soldati-Favre (University of Geneva) for her insights into GRA proteins.

651

## 652 **Declaration of interests**

653 The authors declare no competing interests.

654

## 655 **Author contributions**

656 A.K., C.M.M. and N.C.S. conceived the study; A.K., C.M.M, R.A.W., J.A.W., P.R.G. and S.P.  
657 performed experiments; P.M.H. and P.R.G. provided reagents and intellectual input. A.K.  
658 performed data analysis and wrote the manuscript. N.C.S and C.M.M. commented extensively  
659 on the manuscript; all coauthors read and approved the final manuscript.

660

661

## 662 References

- 663 1. Seeber F, Steinfelder S. Recent advances in understanding apicomplexan parasites.  
664 F1000Research. 2016;5. Epub 2016/06/28. doi: 10.12688/f1000research.7924.1. PubMed PMID:  
665 27347391; PubMed Central PMCID: PMC4909106.
- 666 2. Yarovinsky F. Innate immunity to *Toxoplasma gondii* infection. *Nat Rev Immunol*.  
667 2014;14(2):109-21. Epub 2014/01/25. doi: 10.1038/nri3598. PubMed PMID: 24457485.
- 668 3. Zhang Y, Lin X, Lu F. Current treatment of ocular toxoplasmosis in immunocompetent patients:  
669 a network meta-analysis. *Acta tropica*. 2018;185:52-62. Epub 2018/04/29. doi:  
670 10.1016/j.actatropica.2018.04.026. PubMed PMID: 29704469.
- 671 4. Fallahi S, Rostami A, Nourollahpour Shiadeh M, Behniafar H, Paktinat S. An updated literature  
672 review on maternal-fetal and reproductive disorders of *Toxoplasma gondii* infection. *Journal of*  
673 *gynecology obstetrics and human reproduction*. 2018;47(3):133-40. Epub 2017/12/13. doi:  
674 10.1016/j.jogoh.2017.12.003. PubMed PMID: 29229361.
- 675 5. Dard C, Marty P, Brenier-Pinchart MP, Garnaud C, Fricker-Hidalgo H, Pelloux H, et al.  
676 Management of toxoplasmosis in transplant recipients: an update. *Expert Rev Anti Infect Ther*. 2018.  
677 Epub 2018/06/02. doi: 10.1080/14787210.2018.1483721. PubMed PMID: 29855213.
- 678 6. Rajapakse S, Weeratunga P, Rodrigo C, de Silva NL, Fernando SD. Prophylaxis of human  
679 toxoplasmosis: a systematic review. *Pathogens and global health*. 2017;111(7):333-42. Epub  
680 2017/09/28. doi: 10.1080/20477724.2017.1370528. PubMed PMID: 28948861; PubMed Central  
681 PMCID: PMC5694886.
- 682 7. Sturge CR, Yarovinsky F. Complex immune cell interplay in the gamma interferon response  
683 during *Toxoplasma gondii* infection. *Infect Immun*. 2014;82(8):3090-7. Epub 2014/05/29. doi:  
684 10.1128/iai.01722-14. PubMed PMID: 24866795; PubMed Central PMCID: PMC4136216.
- 685 8. Scharton-Kersten TM, Yap G, Magram J, Sher A. Inducible nitric oxide is essential for host  
686 control of persistent but not acute infection with the intracellular pathogen *Toxoplasma gondii*. *J Exp*  
687 *Med*. 1997;185(7):1261-73. Epub 1997/04/07. PubMed PMID: 9104813; PubMed Central PMCID:  
688 PMC2196248.
- 689 9. Scharton-Kersten TM, Wynn TA, Denkers EY, Bala S, Grunvald E, Hieny S, et al. In the absence  
690 of endogenous IFN-gamma, mice develop unimpaired IL-12 responses to *Toxoplasma gondii* while  
691 failing to control acute infection. *J Immunol*. 1996;157(9):4045-54. Epub 1996/11/01. PubMed PMID:  
692 8892638.
- 693 10. Suzuki Y, Orellana MA, Schreiber RD, Remington JS. Interferon-gamma: the major mediator of  
694 resistance against *Toxoplasma gondii*. *Science*. 1988;240(4851):516-8. Epub 1988/04/22. PubMed  
695 PMID: 3128869.
- 696 11. Gazzinelli R, Xu Y, Hieny S, Cheever A, Sher A. Simultaneous depletion of CD4+ and CD8+ T  
697 lymphocytes is required to reactivate chronic infection with *Toxoplasma gondii*. *J Immunol*.  
698 1992;149(1):175-80. Epub 1992/07/01. PubMed PMID: 1351500.
- 699 12. Oksenhendler E, Cadranel J, Sarfati C, Katlama C, Darty A, Marche C, et al. *Toxoplasma gondii*  
700 pneumonia in patients with the acquired immunodeficiency syndrome. *The American journal of*  
701 *medicine*. 1990;88(5n):18n-21n. Epub 1990/05/01. PubMed PMID: 2368769.
- 702 13. Hunter CA, Subauste CS, Van Cleave VH, Remington JS. Production of gamma interferon by  
703 natural killer cells from *Toxoplasma gondii*-infected SCID mice: regulation by interleukin-10,  
704 interleukin-12, and tumor necrosis factor alpha. *Infect Immun*. 1994;62(7):2818-24. Epub 1994/07/01.  
705 PubMed PMID: 7911785; PubMed Central PMCID: PMC302887.
- 706 14. Denkers EY, Gazzinelli RT, Martin D, Sher A. Emergence of NK1.1+ cells as effectors of IFN-  
707 gamma dependent immunity to *Toxoplasma gondii* in MHC class I-deficient mice. *J Exp Med*.  
708 1993;178(5):1465-72. Epub 1993/11/01. PubMed PMID: 8228800; PubMed Central PMCID:  
709 PMC2191244.
- 710 15. Yarovinsky F, Zhang D, Andersen JF, Bannenberg GL, Serhan CN, Hayden MS, et al. TLR11  
711 activation of dendritic cells by a protozoan profilin-like protein. *Science*. 2005;308(5728):1626-9. Epub  
712 2005/04/30. doi: 10.1126/science.1109893. PubMed PMID: 15860593.



- 713 16. Plattner F, Yarovinsky F, Romero S, Didry D, Carlier MF, Sher A, et al. Toxoplasma profilin is  
714 essential for host cell invasion and TLR11-dependent induction of an interleukin-12 response. *Cell Host*  
715 *Microbe*. 2008;3(2):77-87. Epub 2008/03/04. doi: 10.1016/j.chom.2008.01.001. PubMed PMID:  
716 18312842.
- 717 17. Scanga CA, Aliberti J, Jankovic D, Tilloy F, Bennouna S, Denkers EY, et al. Cutting edge: MyD88  
718 is required for resistance to Toxoplasma gondii infection and regulates parasite-induced IL-12  
719 production by dendritic cells. *J Immunol*. 2002;168(12):5997-6001. Epub 2002/06/11. PubMed PMID:  
720 12055206.
- 721 18. Hou B, Benson A, Kuzmich L, DeFranco AL, Yarovinsky F. Critical coordination of innate immune  
722 defense against Toxoplasma gondii by dendritic cells responding via their Toll-like receptors. *Proc Natl*  
723 *Acad Sci U S A*. 2011;108(1):278-83. Epub 2010/12/22. doi: 10.1073/pnas.1011549108. PubMed PMID:  
724 21173242; PubMed Central PMCID: PMC3017180.
- 725 19. LaRosa DF, Stumhofer JS, Gelman AE, Rahman AH, Taylor DK, Hunter CA, et al. T cell expression  
726 of MyD88 is required for resistance to Toxoplasma gondii. *Proc Natl Acad Sci U S A*. 2008;105(10):3855-  
727 60. Epub 2008/03/01. doi: 10.1073/pnas.0706663105. PubMed PMID: 18308927; PubMed Central  
728 PMCID: PMC2268781.
- 729 20. Sun J, Lanier L. NK cell development, homeostasis and function: parallels with CD8<sup>+</sup> T cells.  
730 *Nature reviews Immunology*. 2011;11(10):645-57.
- 731 21. O'Donnell H, Pham OH, Li LX, Atif SM, Lee SJ, Ravesloot MM, et al. Toll-like receptor and  
732 inflammasome signals converge to amplify the innate bactericidal capacity of T helper 1 cells.  
733 *Immunity*. 2014;40(2):213-24. Epub 2014/02/11. doi: 10.1016/j.immuni.2013.12.013. PubMed PMID:  
734 24508233; PubMed Central PMCID: PMC3960852.
- 735 22. Arend W, Palmer G, Gabay C. IL-1, IL-18, and IL-33 families of cytokines. *Immunol Rev*.  
736 2008;223:20-38.
- 737 23. Schroder K, Tschopp J. The Inflammasomes. *Cell*. 2010;140(6):821-32.
- 738 24. Gorfu G, Cirelli KM, Melo MB, Mayer-Barber K, Crown D, Koller BH, et al. Dual role for  
739 inflammasome sensors NLRP1 and NLRP3 in murine resistance to Toxoplasma gondii. *mBio*. 2014;5(1).  
740 Epub 2014/02/20. doi: 10.1128/mBio.01117-13. PubMed PMID: 24549849; PubMed Central PMCID:  
741 PMC3944820.
- 742 25. Cai G, Kastelein R, Hunter CA. Interleukin-18 (IL-18) enhances innate IL-12-mediated resistance  
743 to Toxoplasma gondii. *Infection and Immunity*. 2000;68(12):6932-8.
- 744 26. Zamboni DS, Lima-Junior DS. Inflammasomes in host response to protozoan parasites.  
745 *Immunol Rev*. 2015;265(1):156-71. Epub 2015/04/17. doi: 10.1111/imr.12291. PubMed PMID:  
746 25879291.
- 747 27. Helbig ET, Opitz B, Sander LE. Adjuvant immunotherapies as a novel approach to bacterial  
748 infections. *Immunotherapy*. 2013;5(4):365-81. Epub 2013/04/06. doi: 10.2217/imt.13.17. PubMed  
749 PMID: 23557420.
- 750 28. Kupz A, Zedler U, Stäber M, Perdomo C, Dorhoi A, Brosch R, et al. ESAT-6–dependent cytosolic  
751 pattern recognition drives noncognate tuberculosis control in vivo. *The Journal of Clinical Investigation*.  
752 2016;126(6). doi: 10.1172/JCI84978.
- 753 29. Kupz A, Guarda G, Gebhardt T, Sander L, Short K, Diavatopoulos D, et al. NLRC4 inflammasomes  
754 in dendritic cells regulate noncognate effector function by memory CD8(+) T cells. *Nat Immunol*.  
755 2012;13(2):162-9.
- 756 30. Soudja SM, Chandrabos C, Yakob E, Veenstra M, Palliser D, Lauvau G. Memory-T-cell-derived  
757 interferon-gamma instructs potent innate cell activation for protective immunity. *Immunity*.  
758 2014;40(6):974-88. Epub 2014/06/17. doi: 10.1016/j.immuni.2014.05.005. PubMed PMID: 24931122;  
759 PubMed Central PMCID: PMC4105986.
- 760 31. Boyman O, Kovar M, Rubinstein M, Surh C, Sprent J. Selective stimulation of T cell subsets with  
761 antibody-cytokine immune complexes. *Science*. 2006;311(5769):1924-7.
- 762 32. Tenter AM, Heckerroth AR, Weiss LM. Toxoplasma gondii: from animals to humans.  
763 *International Journal for Parasitology*. 2000;30(12–13):1217-58. doi: 10.1016/s0020-7519(00)00124-  
764 7.

- 765 33. Boyle JP, Saeij JP, Boothroyd JC. *Toxoplasma gondii*: inconsistent dissemination patterns  
766 following oral infection in mice. *Experimental parasitology*. 2007;116(3):302-5. Epub 2007/03/06. doi:  
767 10.1016/j.exppara.2007.01.010. PubMed PMID: 17335814.
- 768 34. Malik A, Kanneganti TD. Inflammasome activation and assembly at a glance. *Journal of cell*  
769 *science*. 2017;130(23):3955-63. Epub 2017/12/03. doi: 10.1242/jcs.207365. PubMed PMID: 29196474;  
770 PubMed Central PMCID: PMC5769591.
- 771 35. Melo MB, Jensen KDC, Saeij JPJ. *Toxoplasma gondii* effectors are master regulators of the  
772 inflammatory response. *Trends in parasitology*. 2011;27(11):487-95. doi: 10.1016/j.pt.2011.08.001.  
773 PubMed PMID: PMC3200456.
- 774 36. Hakimi MA, Bougdour A. *Toxoplasma*'s ways of manipulating the host transcriptome via  
775 secreted effectors. *Curr Opin Microbiol*. 2015;26:24-31. Epub 2015/04/29. doi:  
776 10.1016/j.mib.2015.04.003. PubMed PMID: 25912924.
- 777 37. Hammoudi PM, Jacot D, Mueller C, Di Cristina M, Dogga SK, Marq JB, et al. Fundamental Roles  
778 of the Golgi-Associated *Toxoplasma* Aspartyl Protease, ASP5, at the Host-Parasite Interface. *PLoS*  
779 *Pathog*. 2015;11(10):e1005211. Epub 2015/10/17. doi: 10.1371/journal.ppat.1005211. PubMed PMID:  
780 26473595; PubMed Central PMCID: PMC4608785.
- 781 38. Kupz A, Zedler U, Staber M, Kaufmann SH. A Mouse Model of Latent Tuberculosis Infection to  
782 Study Intervention Strategies to Prevent Reactivation. *PLoS One*. 2016;11(7):e0158849. Epub  
783 2016/07/09. doi: 10.1371/journal.pone.0158849. PubMed PMID: 27391012; PubMed Central PMCID:  
784 PMC4938611.
- 785 39. Kupz A, Scott TA, Belz GT, Andrews DM, Greyer M, Lew AM, et al. Contribution of Thy1+ NK  
786 cells to protective IFN- $\gamma$  production during *Salmonella* Typhimurium infections. *Proceedings of the*  
787 *National Academy of Sciences*. 2013;110(6):2252-7. doi: 10.1073/pnas.1222047110.
- 788 40. Oldenhove G, Bouladoux N, Wohlfert EA, Hall JA, Chou D, Dos Santos L, et al. Decrease of  
789 Foxp3+ Treg cell number and acquisition of effector cell phenotype during lethal infection. *Immunity*.  
790 2009;31(5):772-86. Epub 2009/11/10. doi: 10.1016/j.immuni.2009.10.001. PubMed PMID: 19896394;  
791 PubMed Central PMCID: PMC2814877.
- 792 41. Akbar H, Dimier-Poisson I, Moire N. Role of CD4+ Foxp3+ Regulatory T Cells in Protection  
793 Induced by a Live Attenuated, Replicating Type I Vaccine Strain of *Toxoplasma gondii*. *Infect Immun*.  
794 2015;83(9):3601-11. Epub 2015/07/01. doi: 10.1128/iai.00217-15. PubMed PMID: 26123802; PubMed  
795 Central PMCID: PMC4534668.
- 796 42. Witola W, Mui E, Hargrave A, Liu S, Hypolite M, Montpetit A, et al. NALP1 influences  
797 susceptibility to human congenital toxoplasmosis, proinflammatory cytokine response, and fate of  
798 *Toxoplasma gondii*-infected monocytic cells. *Infection and Immunity*. 2011;79(2):756-66.
- 799 43. Vladimer Gregory I, Weng D, Paquette Sara WM, Vanaja Sivapriya K, Rathinam Vijay AK, Aune  
800 Marie H, et al. The NLRP12 Inflammasome Recognizes *Yersinia pestis*. *Immunity*. 2012;37(1):96-107.  
801 doi: 10.1016/j.immuni.2012.07.006.
- 802 44. Fernandes-Alnemri T, Yu J-W, Juliana C, Solorzano L, Kang S, Wu J, et al. The AIM2  
803 inflammasome is critical for innate immunity to *Francisella tularensis*. *Nat Immunol*. 2010;11(5):385-  
804 93.
- 805 45. Soudja SMh, Ruiz A, Marie J, Lauvau G. Inflammatory Monocytes Activate Memory CD8(+) T  
806 and Innate NK Lymphocytes Independent of Cognate Antigen during Microbial Pathogen Invasion.  
807 *Immunity*. 2012;37(3):549-62.
- 808 46. Kastenmüller W, Torabi-Parizi P, Subramanian N, Lämmermann T, Germain Ronald N. A  
809 Spatially-Organized Multicellular Innate Immune Response in Lymph Nodes Limits Systemic Pathogen  
810 Spread. *Cell*. 2012;150(6):1235-48.
- 811 47. Quan JH, Huang R, Wang Z, Huang S, Choi IW, Zhou Y, et al. P2X7 receptor mediates NLRP3-  
812 dependent IL-1 $\beta$  secretion and parasite proliferation in *Toxoplasma gondii*-infected human small  
813 intestinal epithelial cells. *Parasites & vectors*. 2018;11(1):1. Epub 2018/01/03. doi: 10.1186/s13071-  
814 017-2573-y. PubMed PMID: 29291748; PubMed Central PMCID: PMC5748956.
- 815 48. Chu JQ, Shi G, Fan YM, Choi IW, Cha GH, Zhou Y, et al. Production of IL-1 $\beta$  and  
816 Inflammasome with Up-Regulated Expressions of NOD-Like Receptor Related Genes in *Toxoplasma*

- 817 gondii-Infected THP-1 Macrophages. The Korean journal of parasitology. 2016;54(6):711-7. Epub  
818 2017/01/18. doi: 10.3347/kjp.2016.54.6.711. PubMed PMID: 28095655; PubMed Central PMCID:  
819 PMCPMC5266351.
- 820 49. Correa G, Almeida Lindenbergh C, Moreira-Souza AC, Savio LE, Takiya CM, Marques-da-Silva C,  
821 et al. Inflammatory early events associated to the role of P2X7 receptor in acute murine toxoplasmosis.  
822 Immunobiology. 2017;222(4):676-83. Epub 2017/01/11. doi: 10.1016/j.imbio.2016.12.007. PubMed  
823 PMID: 28069296.
- 824 50. Miller CM, Zakrzewski AM, Ikin RJ, Boulter NR, Katrib M, Lees MP, et al. Dysregulation of the  
825 inflammatory response to the parasite, *Toxoplasma gondii*, in P2X7 receptor-deficient mice. Int J  
826 Parasitol. 2011;41(3-4):301-8. Epub 2010/11/04. doi: 10.1016/j.ijpara.2010.10.001. PubMed PMID:  
827 21044631.
- 828 51. Moreira-Souza ACA, Almeida-da-Silva CLC, Rangel TP, Rocha GDC, Bellio M, Zamboni DS, et al.  
829 The P2X7 Receptor Mediates *Toxoplasma gondii* Control in Macrophages through Canonical NLRP3  
830 Inflammasome Activation and Reactive Oxygen Species Production. Front Immunol. 2017;8:1257. Epub  
831 2017/10/28. doi: 10.3389/fimmu.2017.01257. PubMed PMID: 29075257; PubMed Central PMCID:  
832 PMCPMC5643413.
- 833 52. Gov L, Schneider CA, Lima TS, Pandori W, Lodoen MB. NLRP3 and Potassium Efflux Drive Rapid  
834 IL-1beta Release from Primary Human Monocytes during *Toxoplasma gondii* Infection. J Immunol.  
835 2017;199(8):2855-64. Epub 2017/09/15. doi: 10.4049/jimmunol.1700245. PubMed PMID: 28904126;  
836 PubMed Central PMCID: PMCPMC5648586.
- 837 53. Lima TS, Gov L, Lodoen MB. Evasion of Human Neutrophil-Mediated Host Defense during  
838 *Toxoplasma gondii* Infection. mBio. 2018;9(1). Epub 2018/02/15. doi: 10.1128/mBio.02027-17.  
839 PubMed PMID: 29440572; PubMed Central PMCID: PMCPMC5821086.
- 840 54. Hammoudi P-M, Jacot D, Mueller C, Di Cristina M, Dogga SK, Marq J-B, et al. Fundamental Roles  
841 of the Golgi-Associated *Toxoplasma* Aspartyl Protease, ASP5, at the Host-Parasite Interface. PLoS  
842 Pathogens. 2015;11(10):e1005211. doi: 10.1371/journal.ppat.1005211. PubMed PMID: PMC4608785.  
843 55. Nadipuram SM, Kim EW, Vashisht AA, Lin AH, Bell HN, Coppens I, et al. In Vivo Biotinylation of  
844 the *Toxoplasma* Parasitophorous Vacuole Reveals Novel Dense Granule Proteins Important for Parasite  
845 Growth and Pathogenesis. mBio. 2016;7(4):e00808-16. doi: 10.1128/mBio.00808-16. PubMed PMID:  
846 PMC4981711.
- 847 56. Gold DA, Kaplan AD, Lis A, Bett GCL, Rosowski EE, Cirelli KM, et al. The *Toxoplasma* dense  
848 granule proteins GRA17 and GRA23 mediate the movement of small molecules between the host and  
849 the parasitophorous vacuole. Cell Host Microbe. 2015;17(5):642-52. doi: 10.1016/j.chom.2015.04.003.  
850 PubMed PMID: PMC4435723.
- 851 57. Franco M, Panas MW, Marino ND, Lee MC, Buchholz KR, Kelly FD, et al. A Novel Secreted  
852 Protein, MYR1, Is Central to *Toxoplasma*'s Manipulation of Host Cells. mBio. 2016;7(1):e02231-15.  
853 Epub 2016/02/04. doi: 10.1128/mBio.02231-15. PubMed PMID: 26838724; PubMed Central PMCID:  
854 PMCPMC4742717.
- 855 58. Marino ND, Panas MW, Franco M, Theisen TC, Naor A, Rastogi S, et al. Identification of a novel  
856 protein complex essential for effector translocation across the parasitophorous vacuole membrane of  
857 *Toxoplasma gondii*. PLoS Pathog. 2018;14(1):e1006828. Epub 2018/01/23. doi:  
858 10.1371/journal.ppat.1006828. PubMed PMID: 29357375; PubMed Central PMCID: PMCPMC5794187.
- 859 59. Naor A, Panas MW, Marino N, Coffey MJ, Tonkin CJ, Boothroyd JC. MYR1-Dependent Effectors  
860 Are the Major Drivers of a Host Cell's Early Response to *Toxoplasma*, Including Counteracting MYR1-  
861 Independent Effects. mBio. 2018;9(2):e02401-17. doi: 10.1128/mBio.02401-17. PubMed PMID:  
862 PMC5885026.
- 863 60. Carson WE, Giri JG, Lindemann MJ, Linett ML, Ahdieh M, Paxton R, et al. Interleukin (IL) 15 is a  
864 novel cytokine that activates human natural killer cells via components of the IL-2 receptor. The Journal  
865 of Experimental Medicine. 1994;180(4):1395-403.
- 866 61. Zwirner N, Domaica C. Cytokine regulation of natural killer cell effector functions. BioFactors.  
867 2010;36(4):274-88.

- 868 62. Ku CC, Murakami M, Sakamoto A, Kappler J, Marrack P. Control of homeostasis of CD8(+) memory T cells by opposing cytokines. *Science*. 2000;288(5466):675-8. PubMed PMID: 870 ISI:000086727100045.
- 871 63. Sprent J, Surh CD. Generation and maintenance of memory T cells. *Curr Opin Immunol*. 872 2001;13(2):248-54.
- 873 64. Li XC, Demirci G, Ferrari-Lacraz S, Groves C, Coyle A, Malek TR, et al. IL-15 and IL-2: a matter of 874 life and death for T cells in vivo. *Nat Med*. 2001;7(1):114-8.
- 875 65. Nishimura H, Hiromatsu K, Kobayashi N, Grabstein KH, Paxton R, Sugamura K, et al. IL-15 is a 876 novel growth factor for murine gamma delta T cells induced by Salmonella infection. *Journal of* 877 *Immunology*. 1996;156(2):663-9. PubMed PMID: ISI:A1996TP36600031.
- 878 66. Lieberman LA, Villegas EN, Hunter CA. Interleukin-15-deficient mice develop protective 879 immunity to *Toxoplasma gondii*. *Infect Immun*. 2004;72(11):6729-32. Epub 2004/10/27. doi: 880 10.1128/iai.72.11.6729-6732.2004. PubMed PMID: 15501812; PubMed Central PMCID: 881 PMCPMC523054.
- 882 67. Khan IA, Moretto M, Wei XQ, Williams M, Schwartzman JD, Liew FY. Treatment with soluble 883 interleukin-15 exacerbates intracellular parasitic infection by blocking the development of 884 memory CD8+ T cell response. *J Exp Med*. 2002;195(11):1463-70. Epub 2002/06/05. PubMed PMID: 885 12045244; PubMed Central PMCID: PMCPMC2193543.
- 886 68. Villegas EN, Lieberman LA, Carding SR, Hunter CA. Susceptibility of interleukin-2-deficient mice 887 to *Toxoplasma gondii* is associated with a defect in the production of gamma interferon. *Infect Immun*. 888 2002;70(9):4757-61. Epub 2002/08/17. PubMed PMID: 12183516; PubMed Central PMCID: 889 PMCPMC128219.
- 890 69. Sharma SD, Hofflin JM, Remington JS. In vivo recombinant interleukin 2 administration 891 enhances survival against a lethal challenge with *Toxoplasma gondii*. *J Immunol*. 1985;135(6):4160-3. 892 Epub 1985/12/01. PubMed PMID: 3877764.
- 893 70. Shirahata T, Muroya N, Ohta C, Goto H, Nakane A. Enhancement by recombinant human 894 interleukin 2 of host resistance to *Toxoplasma gondii* infection in pregnant mice. *Microbiol Immunol*. 895 1993;37(7):583-90. Epub 1993/01/01. PubMed PMID: 8231971.
- 896 71. Stoklasek TA, Schluns KS, Lefrançois L. Combined IL-15/IL-15R $\alpha$  Immunotherapy Maximizes IL- 897 15 Activity In Vivo. *The Journal of Immunology*. 2006;177(9):6072-80.
- 898 72. Stonier S, Schluns K. Trans-presentation: a novel mechanism regulating IL-15 delivery and 899 responses. *Immunol Lett*. 2010;127(2):85-92.
- 900 73. Votavova P, Tomala J, Kovar M. Increasing the biological activity of IL-2 and IL-15 through 901 complexing with anti-IL-2 mAbs and IL-15R $\alpha$ -Fc chimera. *Immunol Lett*. 2014;159(1-2):1-10. doi: 902 <http://dx.doi.org/10.1016/j.imlet.2014.01.017>.
- 903 74. Shevach EM. Application of IL-2 therapy to target T regulatory cell function. *Trends Immunol*. 904 2012;33(12):626-32. Epub 2012/09/07. doi: 10.1016/j.it.2012.07.007. PubMed PMID: 22951308; 905 PubMed Central PMCID: PMCPMC3505275.
- 906 75. Liu Y, Zhao M, Xu X, Liu X, Zhang H, Jiang Y, et al. Adoptive transfer of Treg cells counters 907 adverse effects of *Toxoplasma gondii* infection on pregnancy. *J Infect Dis*. 2014;210(9):1435-43. Epub 908 2014/05/07. doi: 10.1093/infdis/jiu265. PubMed PMID: 24799601.
- 909 76. Tenorio EP, Fernandez J, Castellanos C, Olguin JE, Saavedra R. CD4+ Foxp3+ regulatory T cells 910 mediate *Toxoplasma gondii*-induced T-cell suppression through an IL-2-related mechanism but 911 independently of IL-10. *Eur J Immunol*. 2011;41(12):3529-41. Epub 2011/09/10. doi: 912 10.1002/eji.201141507. PubMed PMID: 21905022.
- 913 77. Olguin JE, Fernandez J, Salinas N, Juarez I, Rodriguez-Sosa M, Campuzano J, et al. Adoptive 914 transfer of CD4(+)Foxp3(+) regulatory T cells to C57BL/6J mice during acute infection with *Toxoplasma* 915 *gondii* down modulates the exacerbated Th1 immune response. *Microbes Infect*. 2015;17(8):586-95. 916 Epub 2015/04/23. doi: 10.1016/j.micinf.2015.04.002. PubMed PMID: 25899946.
- 917 78. Salinas N, Olguin JE, Castellanos C, Saavedra R. T cell suppression in vitro during *Toxoplasma* 918 *gondii* infection is the result of IL-2 competition between Tregs and T cells leading to death of



- 919 proliferating T cells. *Scand J Immunol.* 2014;79(1):1-11. Epub 2013/10/15. doi: 10.1111/sji.12120.  
920 PubMed PMID: 24117537.
- 921 79. Burrack KS, Huggins MA, Taras E, Dougherty P, Henzler CM, Yang R, et al. Interleukin-15  
922 Complex Treatment Protects Mice from Cerebral Malaria by Inducing Interleukin-10-Producing Natural  
923 Killer Cells. *Immunity.* 2018;48(4):760-72.e4. Epub 2018/04/08. doi: 10.1016/j.immuni.2018.03.012.  
924 PubMed PMID: 29625893; PubMed Central PMCID: PMC5906161.
- 925 80. Epardaud M, Elpek KG, Rubinstein MP, Yonekura A-r, Bellemare-Pelletier A, Bronson R, et al.  
926 Interleukin-15/Interleukin-15R $\alpha$  Complexes Promote Destruction of Established Tumors by Reviving  
927 Tumor-Resident CD8+ T Cells. *Cancer research.* 2008;68(8):2972-83. doi: 10.1158/0008-5472.can-08-  
928 0045.
- 929 81. Dubois S, Patel HJ, Zhang M, Waldmann TA, Müller JR. Preassociation of IL-15 with IL-15R $\alpha$ -  
930 IgG1-Fc Enhances Its Activity on Proliferation of NK and CD8+/CD44<sup>high</sup> T Cells and Its Antitumor  
931 Action. *The Journal of Immunology.* 2008;180(4):2099-106.
- 932 82. Huntington ND, Legrand N, Alves NL, Jaron B, Weijer K, Plet A, et al. IL-15 trans-presentation  
933 promotes human NK cell development and differentiation in vivo. *The Journal of Experimental*  
934 *Medicine.* 2009;206(1):25-34. doi: 10.1084/jem.20082013.
- 935 83. Hamilton SE, Schenkel JM, Akue AD, Jameson SC. IL-2 Complex Treatment Can Protect Naive  
936 Mice from Bacterial and Viral Infection. *The Journal of Immunology.* 2010;185(11):6584-90. doi:  
937 10.4049/jimmunol.1001215.
- 938 84. Boyman O, Kolios AG, Raeber ME. Modulation of T cell responses by IL-2 and IL-2 complexes.  
939 *Clinical and experimental rheumatology.* 2015;33(4 Suppl 92):S54-7. Epub 2015/10/13. PubMed PMID:  
940 26457438.
- 941 85. Molloy MJ, Zhang W, Usherwood EJ. Cutting Edge: IL-2 Immune Complexes As a Therapy for  
942 Persistent Virus Infection. *The Journal of Immunology.* 2009;182(8):4512-5. doi:  
943 10.4049/jimmunol.0804175.
- 944 86. Kamimura D, Sawa Y, Sato M, Agung E, Hirano T, Murakami M. IL-2 In Vivo Activities and  
945 Antitumor Efficacy Enhanced by an Anti-IL-2 mAb. *The Journal of Immunology.* 2006;177(1):306-14.  
946 doi: 10.4049/jimmunol.177.1.306.
- 947 87. Tomala J, Chmelova H, Mrkvan T, Rihova B, Kovar M. In Vivo Expansion of Activated Naive CD8+  
948 T Cells and NK Cells Driven by Complexes of IL-2 and Anti-IL-2 Monoclonal Antibody As Novel Approach  
949 of Cancer Immunotherapy. *The Journal of Immunology.* 2009;183(8):4904-12. doi:  
950 10.4049/jimmunol.0900284.
- 951 88. Caudana P, Nunez N, DelaRochere P, Pinto A, Denizeau J, Alonso R, et al. IL2/anti-IL2 complex  
952 combined with CTLA-4, but not PD-1, blockade rescues antitumor NK cell function by regulatory T-cell  
953 modulation. *Cancer immunology research.* 2019. Epub 2019/01/18. doi: 10.1158/2326-6066.cir-18-  
954 0697. PubMed PMID: 30651291.
- 955 89. Masters SL, Gerlic M, Metcalf D, Preston S, Pellegrini M, O'Donnell JA, et al. NLRP1  
956 inflammasome activation induces pyroptosis of hematopoietic progenitor cells. *Immunity.*  
957 2012;37(6):1009-23. Epub 2012/12/12. doi: 10.1016/j.immuni.2012.08.027. PubMed PMID:  
958 23219391; PubMed Central PMCID: PMC4275304.
- 959 90. Shen B, Brown KM, Lee TD, Sibley LD. Efficient gene disruption in diverse strains of *Toxoplasma*  
960 *gondii* using CRISPR/CAS9. *mBio.* 2014;5(3):e01114-14. Epub 2014/05/16. doi: 10.1128/mBio.01114-  
961 14. PubMed PMID: 24825012; PubMed Central PMCID: PMC4030483.
- 962 91. Striepen B, He CY, Matrajt M, Soldati D, Roos DS. Expression, selection, and organellar targeting  
963 of the green fluorescent protein in *Toxoplasma gondii*. *Molecular and biochemical parasitology.*  
964 1998;92(2):325-38. Epub 1998/07/10. PubMed PMID: 9657336.
- 965 92. Weigmann B, Tubbe I, Seidel D, Nicolaev A, Becker C, Neurath MF. Isolation and subsequent  
966 analysis of murine lamina propria mononuclear cells from colonic tissue. *Nature protocols.*  
967 2007;2(10):2307-11. Epub 2007/10/20. doi: 10.1038/nprot.2007.315. PubMed PMID: 17947970.
- 968 93. Melgar S, Karlsson A, Michaelsson E. Acute colitis induced by dextran sulfate sodium  
969 progresses to chronicity in C57BL/6 but not in BALB/c mice: correlation between symptoms and

970 inflammation. American journal of physiology Gastrointestinal and liver physiology.  
971 2005;288(6):G1328-38. Epub 2005/01/08. doi: 10.1152/ajpgi.00467.2004. PubMed PMID: 15637179.  
972 94. Buffet PA, Sulahian A, Garin YJ, Nassar N, Derouin F. Culture microtitration: a sensitive method  
973 for quantifying *Leishmania infantum* in tissues of infected mice. Antimicrob Agents Chemother.  
974 1995;39(9):2167-8. Epub 1995/09/01. PubMed PMID: 8540741; PubMed Central PMCID:  
975 PMCPMC162906.  
976 95. Sester DP, Zamoshnikova A, Thygesen SJ, Vajjhala PR, Cridland SO, Schroder K, et al.  
977 Assessment of Inflammasome Formation by Flow Cytometry. Current protocols in immunology.  
978 2016;114:14.40.1-14.40.29. Epub 2016/08/02. doi: 10.1002/cpim.13. PubMed PMID: 27479658.  
979

980 **Figure Captions**

981 **Figure 1: *Toxoplasma*-driven IFN- $\gamma$  secretion by non-CD4 immune cells following oral**  
982 **infection with brain cysts or intravenous (i.v.) infection with tachyzoites.** (A, B) Percent of  
983 IFN- $\gamma^+$  cells amongst total viable splenic CD3<sup>+</sup>CD4<sup>+</sup>, CD3<sup>+</sup>CD8<sup>+</sup>, CD3<sup>+</sup>CD4<sup>-</sup>CD8<sup>-</sup> (DN) T  
984 cells and CD3<sup>-</sup>NKp46<sup>+</sup> cells 1 day (A) or 5 days (B) after B6 mice were inoculated orally with  
985 10, 40 or 100 *T. gondii* ME49 brain cysts. (C) Percent of IFN- $\gamma^+$  cells amongst total viable  
986 splenic CD3<sup>+</sup>CD4<sup>+</sup>, CD3<sup>+</sup>CD8<sup>+</sup>, CD3<sup>+</sup>CD4<sup>-</sup>CD8<sup>-</sup> (DN) T cells and CD3<sup>-</sup>NKp46<sup>+</sup> cells at 2-72  
987 hours after B6 mice were injected i.v. with 10<sup>7</sup> *T. gondii* ME49 tachyzoites. (D) Percent of IFN-  
988  $\gamma^+$  cells amongst total viable splenic CD3<sup>+</sup>CD4<sup>+</sup>, CD3<sup>+</sup>CD8<sup>+</sup>, CD3<sup>+</sup>CD4<sup>-</sup>CD8<sup>-</sup> (DN) T cells and  
989 CD3<sup>-</sup>NKp46<sup>+</sup> cells at 24 hours after B6 mice were injected i.p. with 10<sup>7</sup> *T. gondii* ME49  
990 tachyzoites. (E-G) Serum concentrations of IL-6 (E), TNF $\alpha$  (F) and IL-10 (G) at 2-72 hours  
991 after B6 mice were injected i.v. with 10<sup>7</sup> *T. gondii* ME49 tachyzoites. Results are presented as  
992 pooled data means  $\pm$  SEM from at least two pooled independent experiments (n = 5-10 mice  
993 per group). See also S1 Figure.

994

995 **Figure 2: Rapid IFN- $\gamma$  production in response to *T. gondii* requires IL-12 and IL-18.**

996 Percent of IFN- $\gamma^+$  cells amongst total viable CD3<sup>-</sup>NKp46<sup>+</sup> cells in the spleen (A, C) and serum  
997 cytokine concentrations (D-F) 24 hours after B6 or *Il18*<sup>-/-</sup> mice were injected i.v. with 10<sup>7</sup> *T.*  
998 *gondii* ME49 tachyzoites. Some mice received an i.p. injection of 200  $\mu$ g mAb against IL-18  
999 and/or IL-12 immediately after injection of *T. gondii*. (B) Serum concentrations of IL-18, IL-  
1000 12p70 and IFN- $\gamma$  at various time points after i.v. injection of 10<sup>7</sup> *T. gondii* ME49 tachyzoites.  
1001 Some mice were additionally treated with mAb against IL-12 and/or IL-18 immediately after  
1002 injection of *T. gondii* ME49. Results are presented as individual data points (A, C, D-F) or as  
1003 means  $\pm$  SEM (B) of 4-15 mice per group from at least two pooled independent experiments.  
1004 Statistical analyses: One-way ANOVA followed by Dunnett's multiple comparison test;

1005 significant differences are indicated by asterisks: \*  $p < 0.05$ ; \*\*  $p < 0.01$ ; \*\*\*  $p < 0.001$ ; \*\*\*\*  
1006  $p < 0.0001$ .

1007

1008 **Figure 3: IL-18-driven IFN- $\gamma$  secretion to *T. gondii* depends on multiple redundant**  
1009 **inflammasomes.** (A, B) Percent of IFN- $\gamma^+$  cells amongst total CD3<sup>-</sup>NKp46<sup>+</sup> cells in the spleen  
1010 (A) and serum IL-18 concentrations (B) 24 hours after i.v. injection of  $10^7$  *T. gondii* ME49  
1011 tachyzoites into B6 mice and different mouse strains lacking either *Caspase1/11*, *Nlrp1*, *Nlrp3*  
1012 or *Nlrp1* and *Nlrp3*. Results are presented as individual data points of 3-25 mice per group from  
1013 at least two pooled independent experiments. Statistical analyses: One-way ANOVA per strain  
1014 followed by Dunnett's multiple comparison test; significant differences are indicated by  
1015 asterisks: \*  $p < 0.05$ ; \*\*  $p < 0.01$ ; \*\*\*  $p < 0.001$ ; \*\*\*\*  $p < 0.0001$ ; n.s. not significant.

1016

1017 **Figure 4: *T. gondii* activates inflammasomes in multiple cell types.** (A, B) Percent of IFN-  
1018  $\gamma^+$  cells amongst total viable splenic CD3<sup>+</sup>CD4<sup>+</sup>, CD3<sup>+</sup>CD8<sup>+</sup>, CD3<sup>+</sup>CD4<sup>-</sup>CD8<sup>-</sup> (DN) T cells and  
1019 CD3<sup>-</sup>NKp46<sup>+</sup> cells (A) and serum IL-18 levels (B) in naïve mice 24 hours after i.v. injection of  
1020  $10^7$  *T. gondii* ME49-RFP tachyzoites. (C, E) Representative FACS plots showing total viable  
1021 splenic RFP<sup>+</sup> cells (C) and gated RFP<sup>+</sup> cells (E) 24 hours after i.v. injection of  $10^7$  *T. gondii*  
1022 ME49-RFP tachyzoites. (D) IL-18 levels in supernatant of sorted RFP<sup>+</sup> and RFP<sup>-</sup> cells after  
1023 incubation at 37°C for 24 hours. (F) Enumeration of RFP<sup>+</sup> cell types shown in d. (G)  
1024 Representative histograms of cell type-specific gated RFP<sup>+</sup> and RFP<sup>-</sup> cells showing expression  
1025 levels of ASC (left panels) or FAM-YVAD (right panels) 24 hours after i.v. injection with  $10^7$   
1026 *T. gondii* ME49-RFP tachyzoites. FMO control for ASC panels are cells from infected animals  
1027 that did not get stained with anti-ASC-Alexa488 but all other antibodies. FMO control for  
1028 FAM-YVAD are cells from mice that were injected with *T. gondii* ME49-RFP but did not  
1029 receive an injection with FLICA FAM-YVAD. Results are presented as individual data points  
1030 (D, F), pooled data means  $\pm$  SEM (A, B) and representative FACS plots (C, E) and histograms



1031 (G) of 6-9 mice from two or three pooled independent experiments. Statistical analyses: One-  
1032 way ANOVA followed by Dunnett's multiple comparison test (A) or Student's *t*-test (B, D);  
1033 significant differences are indicated by asterisks: \*  $p < 0.05$ ; \*\*  $p < 0.01$ .

1034

1035 **Figure 5: IL-18 driven IFN- $\gamma$  secretion to *T. gondii* depends on parasite invasion but is**  
1036 **independent of secreted GRA proteins.** Percent of IFN- $\gamma^+$  cells amongst total viable splenic  
1037 CD3 $^-$ NKp46 $^+$  cells (A, C) and serum IL-18 levels (B, D) in naïve mice 24 and 48 hours after  
1038 i.v. injection of live  $10^7$  *T. gondii* ME49 (A-D), DEG (C, D) or ME49 $\Delta$ ASP5 tachyzoites (C,  
1039 D), heat-killed (A, B) or sonicated ME49 tachyzoites (A, B), or HFF debris with culture  
1040 supernatant (A, B). Results are presented as individual data points of 4-15 mice per group from  
1041 at least two pooled independent experiments. Statistical analyses: One-way ANOVA per time-  
1042 point followed by Dunnett's multiple comparison test; significant differences are indicated by  
1043 asterisks: \*\*\*  $p < 0.001$ ; n.s. not significant. See also S2 Figure.

1044

1045 **Figure 6: IL2C treatment expands IL-18-responsive IFN- $\gamma$ -secreting cell subsets**

1046 (A-D) Naïve B6 mice were treated i.p. with IL2C on four consecutive days. One day after the  
1047 last administration, mice were euthanased and numbers of CD3 $^+$ CD8 $^+$ , CD3 $^+$ CD4 $^-$ CD8 $^-$  (DN)  
1048 and CD3 $^-$ NKp46 $^+$  cells in spleen (B), MLN (C) and PP (D) were assessed by FACS. (E, F)  
1049 Naïve B6 mice were treated i.p. with IL2C on four consecutive days. Two days after the last  
1050 IL2C treatment mice were injected i.v. with  $10^7$  *T. gondii* ME49 tachyzoites and proportions  
1051 (E) and total numbers (F) of viable splenic CD3 $^-$ NKp46 $^+$  IFN- $\gamma^+$  cells were enumerated 24  
1052 hours later. (G) IFN- $\gamma$  serum concentrations 24 hours after mice were injected i.v. with  $10^7$  *T.*  
1053 *gondii* ME49 tachyzoites. (H, I) Expression of IL18R (H) and IL12R (I) on IFN- $\gamma^-$  (blue  
1054 histogram) and IFN- $\gamma^+$  CD3 $^-$ NKp46 $^+$  cells after i.v. infection with  $10^7$  *T. gondii* ME49  
1055 tachyzoites with (orange histogram) or without (red histogram) IL2C treatment. Results are  
1056 presented as pooled data means  $\pm$  SEM with individual data points (G-I) from at least two

1057 pooled independent experiments with 5-6 mice per group (B-I) and as representative histograms  
1058 and individual data points of mean fluorescent intensity (H, I). Statistical analyses: One-way  
1059 ANOVA followed by Tuckey's multiple comparison test (A-D); significant differences are  
1060 indicated by asterisks: \*  $p < 0.05$ ; \*\*  $p < 0.01$ ; \*\*\*  $p < 0.001$ ; \*\*\*\*  $p < 0.0001$ ; n.s. not significant.  
1061 See also S3 Figure.

1062

1063 **Figure 7: IL2C pre-treatment protects mice from acute, lethal toxoplasmosis**  
1064 **independently of T<sub>Reg</sub> expansion and parasite burden.** (A-C) Naïve B6 mice were treated  
1065 i.p. with IL2C on four consecutive days or left untreated. Two days after the last IL2C treatment,  
1066 mice were inoculated orally with 10 or 40 *T. gondii* ME49 brain cysts and survival was assessed  
1067 over time. (D-F) Naïve B6 mice were treated i.p. with IL2C on four consecutive days. Two  
1068 days after the last IL2C treatment, mice were inoculated orally with 10 *T. gondii* ME49 brain  
1069 cysts. IL2C-treated animals received weekly i.p. injections with mAb against CD8, NK1.1,  
1070 Thy1.2, IFN- $\gamma$  or control rIgG (E) or against IL-12, IL-18, IFN- $\gamma$  (F). Survival was assessed  
1071 over time (B, C, E, F). Gross pathology of the intestine (G) and liver (H) was assessed 9 days  
1072 after infection with 10 *T. gondii* ME49 brain cysts. Parasite burden was assessed using  
1073 splenocytes (I). CD3<sup>+</sup>CD4<sup>+</sup>CD25<sup>+</sup>Foxp3<sup>+</sup> regulatory T cells were enumerated in MLN and LP  
1074 at 2, 4 and 9 days after infection. Representative FACS plots from day 2 after infection (J) and  
1075 mean T<sub>Reg</sub> numbers  $\pm$  SEM in MLN (K) and LP (L) are shown. Results are presented as  
1076 individual data points (G-I), pooled data means (B, C, E, F, K, L) or representative FACS plots  
1077 (J) from two to three pooled independent experiments with 5-15 mice per group. Statistical  
1078 analyses: One-way ANOVA followed by Dunnett's multiple comparison test (G-I, K, L) or  
1079 Log-rank (Mantel-Cox) test (B, C, E, F); significant differences are indicated by asterisks: \*  
1080  $p < 0.05$ ; \*\*  $p < 0.01$ ; \*\*\*  $p < 0.001$ ; \*\*\*\*  $p < 0.0001$ .

1081

1082

1083 **S1 Figure: Low dose injection of *T. gondii* ME49 tachyzoites does not induce rapid IFN- $\gamma$**   
1084 **secretion.** Percent of IFN- $\gamma^+$  cells amongst total viable CD3<sup>+</sup>CD4<sup>+</sup>, CD3<sup>+</sup>CD8<sup>+</sup>, CD3<sup>+</sup>CD4<sup>-</sup>  
1085 CD8<sup>-</sup> (DN) T cells and CD3<sup>-</sup>NKp46<sup>+</sup> cells in three Payers Patches 1 day (A) or 5 days (B) after  
1086 B6 mice were inoculated orally with 10, 40 or 100 *T. gondii* ME49 brain cysts; 2-72 hours after  
1087 mice were injected i.v. with 10<sup>7</sup> *T. gondii* ME49 tachyzoites (C) or 24 hours after mice were  
1088 infected i.p. with 10<sup>7</sup> *T. gondii* ME49 tachyzoites (D). (E) Percent of IFN- $\gamma^+$  cells amongst total  
1089 viable CD3<sup>+</sup>CD4<sup>+</sup>, CD3<sup>+</sup>CD8<sup>+</sup>, CD3<sup>+</sup>CD4<sup>-</sup>CD8<sup>-</sup> (DN) T cells and CD3<sup>-</sup>NKp46<sup>+</sup> cells from  
1090 spleen, mesenteric lymph nodes or three Peyer's Patches (PP) at 2-72 hours after B6 mice were  
1091 injected i.p. or i.v. with 10<sup>5</sup> *T. gondii* ME49 tachyzoites. Results are presented as individual  
1092 data points (E) or pooled data means (A-D) from two pooled independent experiments with 3-  
1093 10 mice per group.

1094

1095 **S2 Figure: IL-18 driven IFN- $\gamma$  secretion to *T. gondii* is independent of secreted GRA**  
1096 **proteins.** Percent of IFN- $\gamma^+$  cells amongst total viable splenic CD3<sup>-</sup>NKp46<sup>+</sup> cells in naïve mice  
1097 24 hours after i.v. injection of 10<sup>7</sup> *T. gondii* ME49, ME49 GRA20-deficient or ME49 GRA23-  
1098 deficient tachyzoites. Mice were treated with mAb against IL-12 immediately after injection of  
1099 *T. gondii*. Results are presented as individual data points of 4-15 mice per group from at least  
1100 two pooled independent experiments. Statistical analyses: One-way ANOVA followed by  
1101 Dunnett's multiple comparison test; not significant.

1102

1103 **S3 Figure: IL2C treatment expands IL-18 responsive IFN- $\gamma$ -secreting cell subsets but has**  
1104 **no impact on upstream IL-18 secretion**

1105 (A, B) Naïve B6 mice were treated i.p. with IL2C on four consecutive days. Two days after the  
1106 last IL2C treatment mice were injected i.v. with 10<sup>7</sup> *T. gondii* ME49 tachyzoites and viable  
1107 splenic CD3<sup>+</sup>CD4<sup>+</sup>, CD3<sup>+</sup>CD8<sup>+</sup>, CD3<sup>+</sup>CD4<sup>-</sup>CD8<sup>-</sup> (DN) T cells IFN- $\gamma$ -secreting cells (A) were

1108 enumerated 24 hours later, and serum IL-18 (B) levels were measured. Statistical analyses:  
1109 One-way ANOVA followed by Dunnett's multiple comparison test; significant differences are  
1110 indicated by asterisks: \*  $p < 0.05$ ; \*\*  $p < 0.01$ ; \*\*\*  $p < 0.001$ ; n.s. not significant.

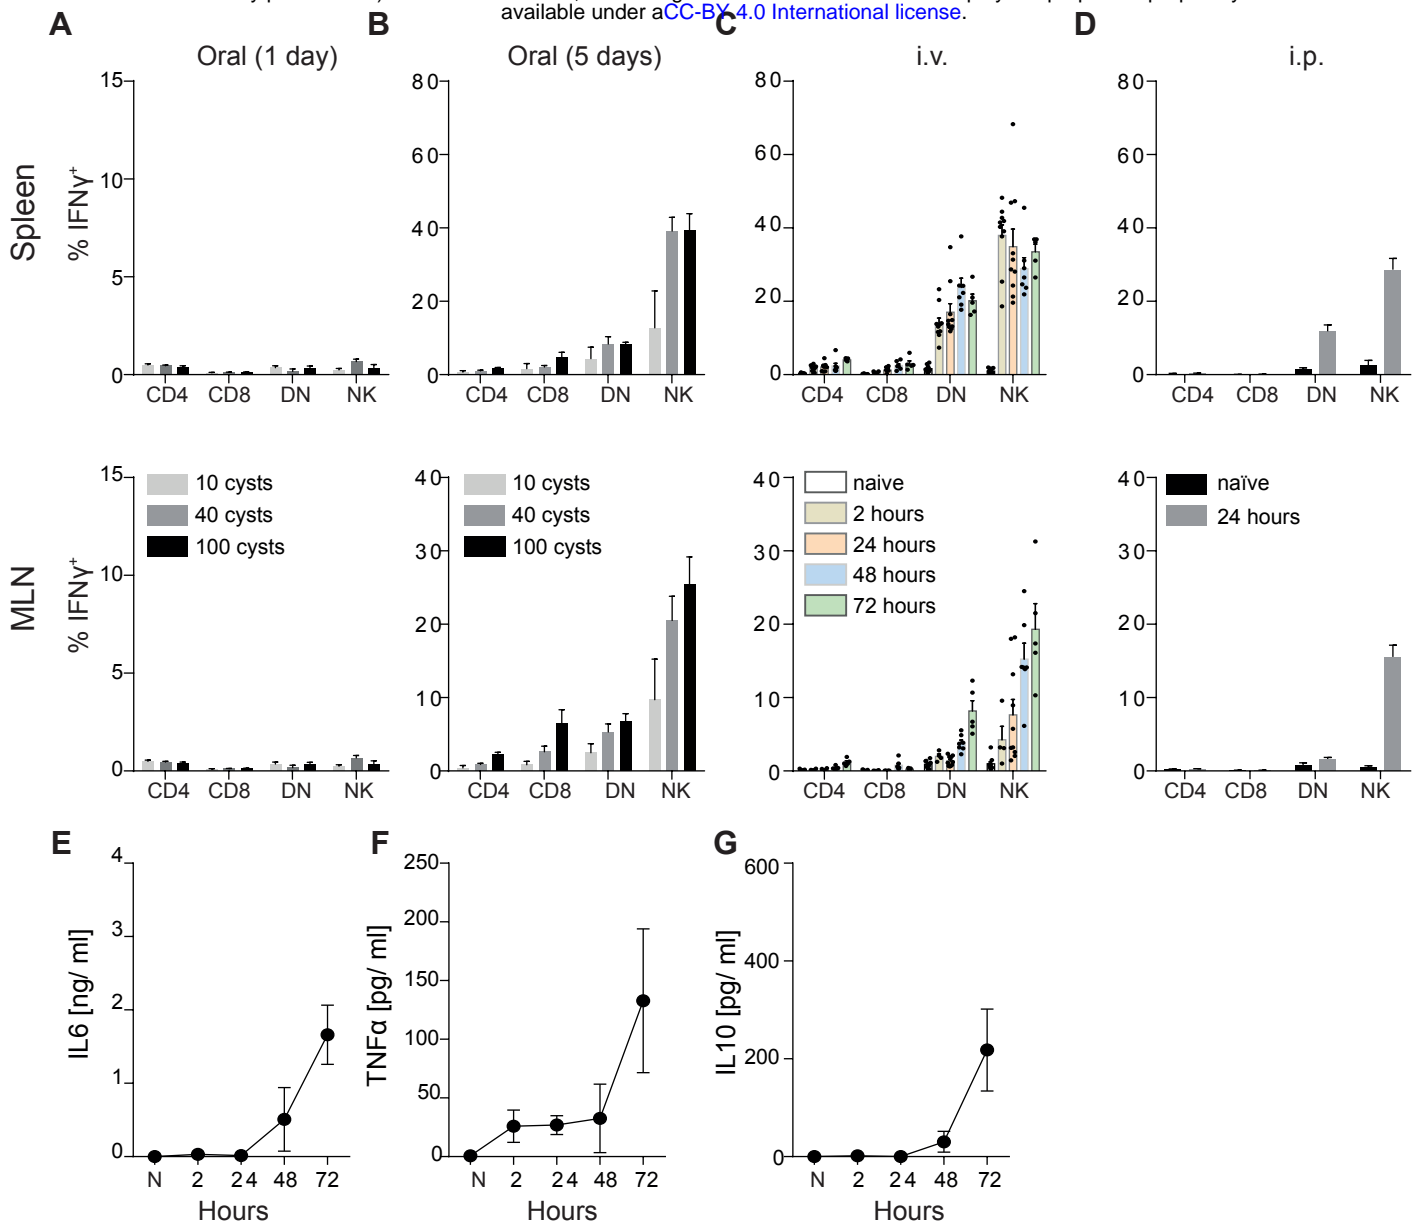

Figure 1: A model to study *Toxoplasma*-driven IFN $\gamma$  secretion by non-CD4 immune cells following oral infection with brain cysts or intravenous infection with tachyzoites

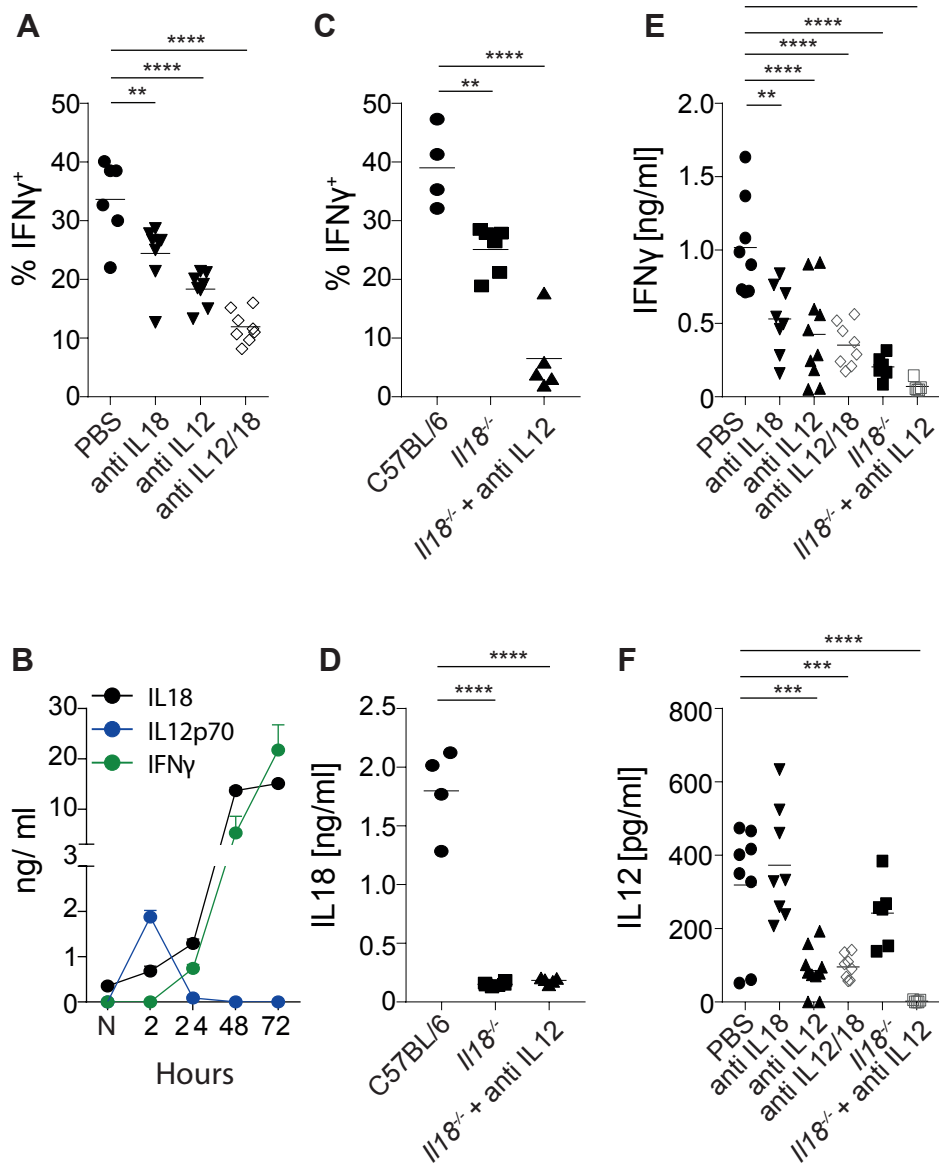

Figure 2: Rapid IFN $\gamma$ -production in response to *T. gondii* requires IL12 and IL18

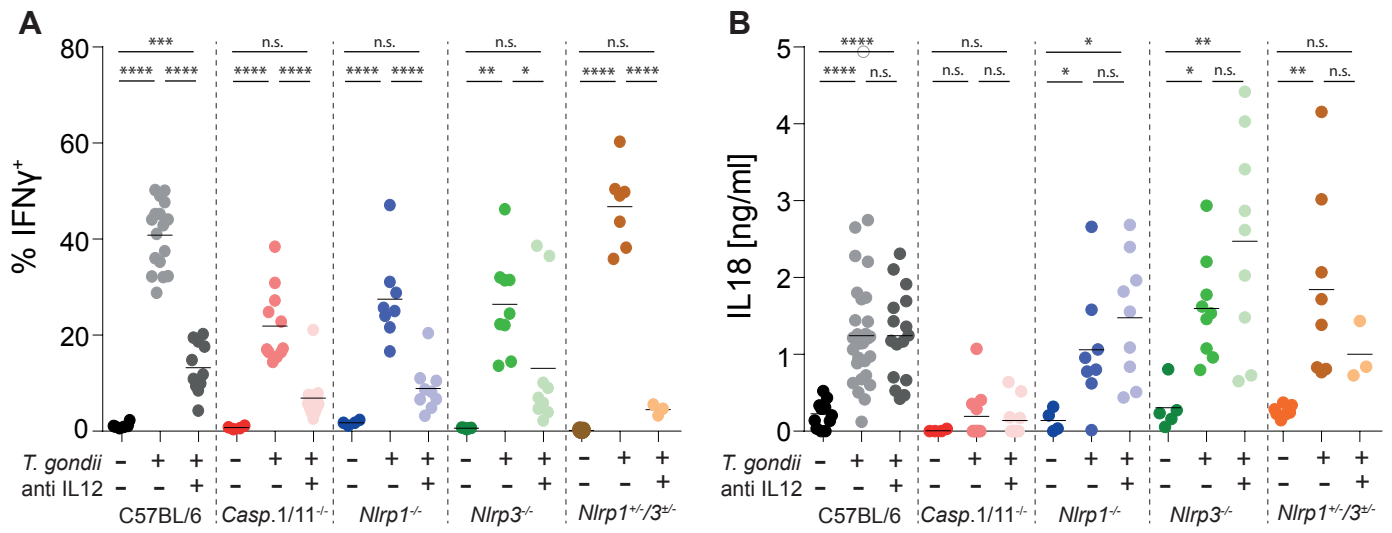



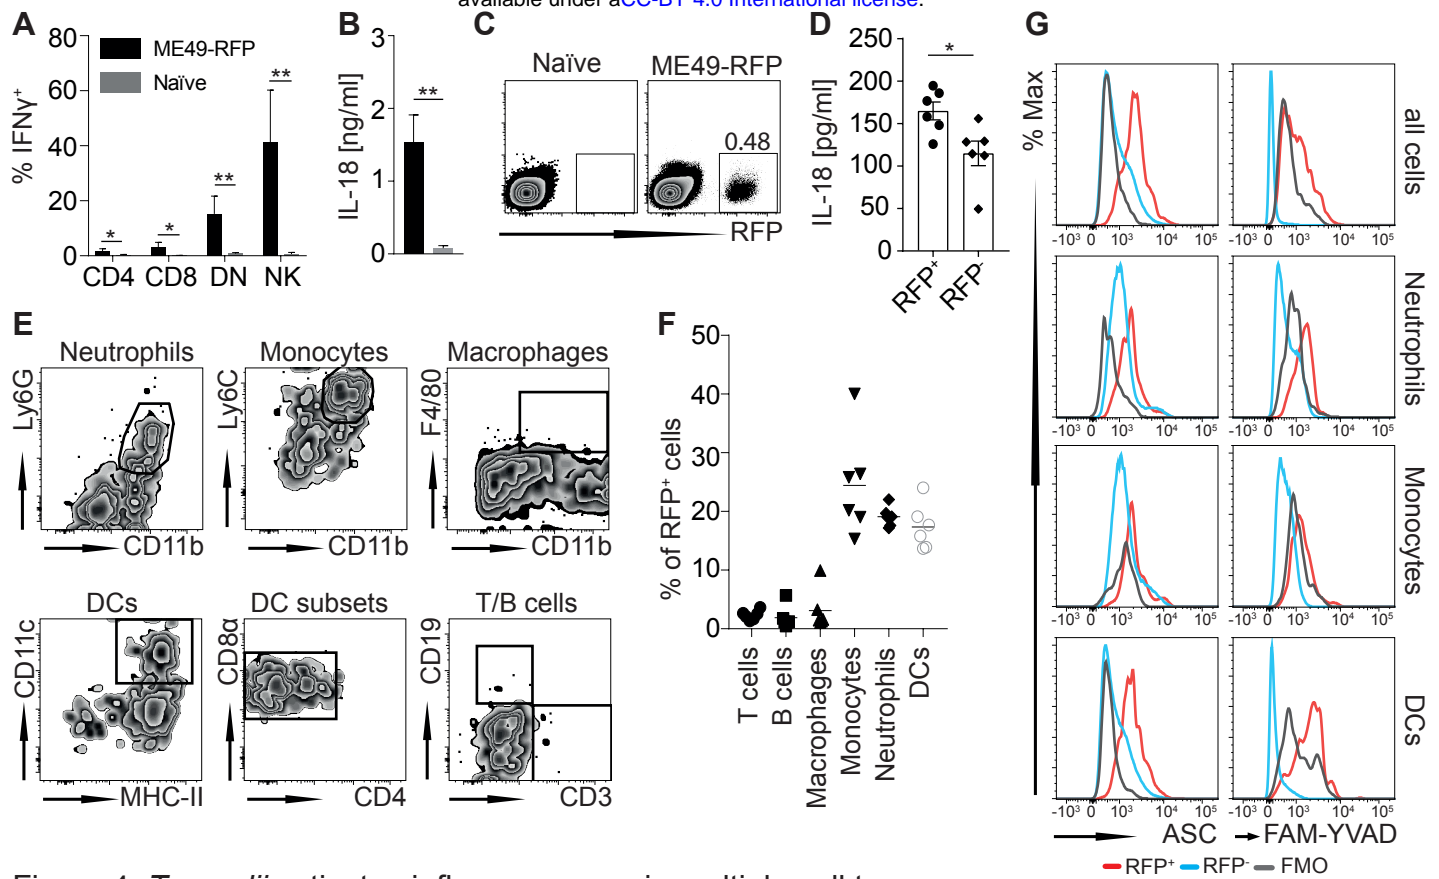

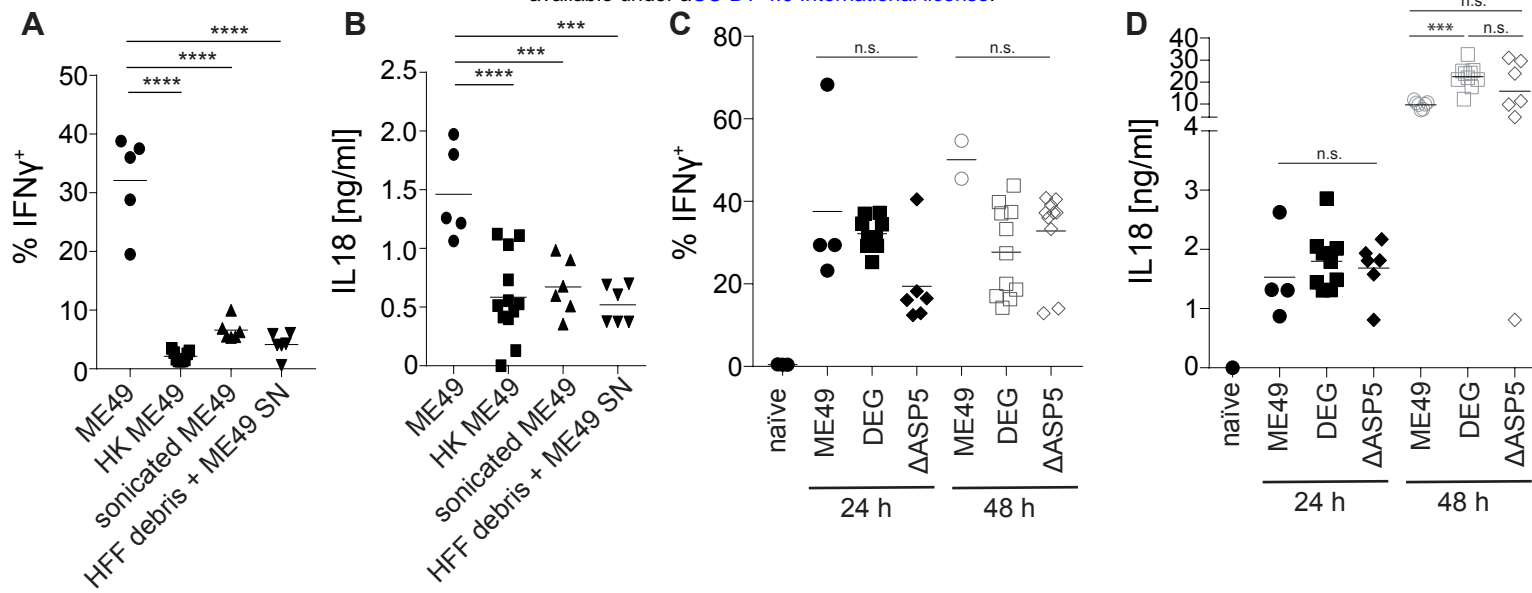

Figure 5: IL18-driven IFN $\gamma$  secretion to *T. gondii* depends on parasite invasion but is independent of secreted GRA proteins

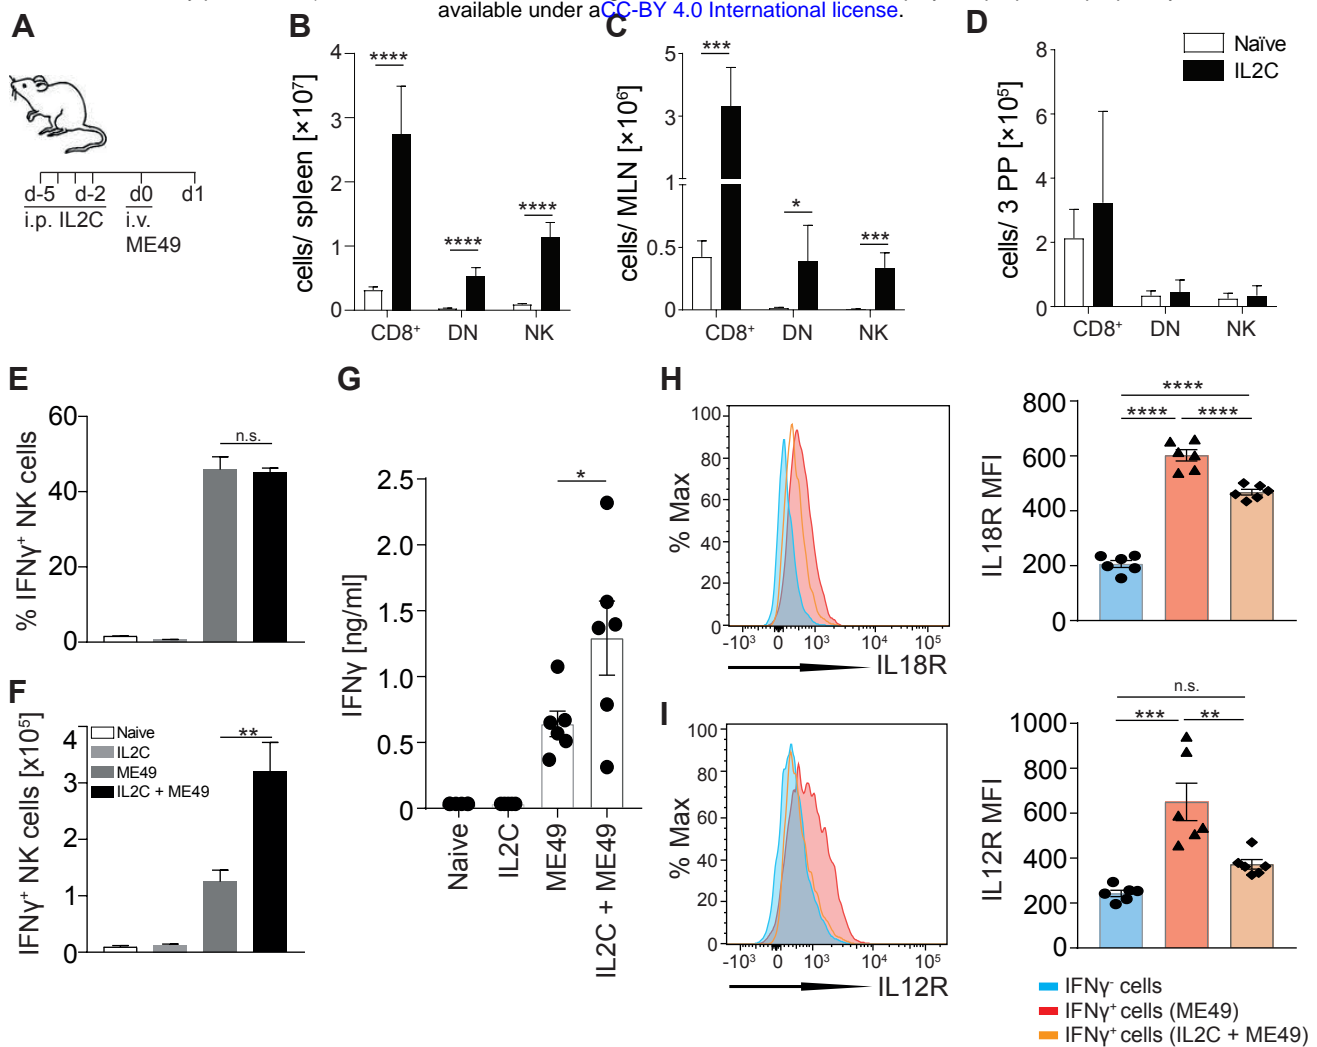

Figure 6: IL2C treatment expands IL-18-responsive IFN $\gamma$ -secreting cell subsets

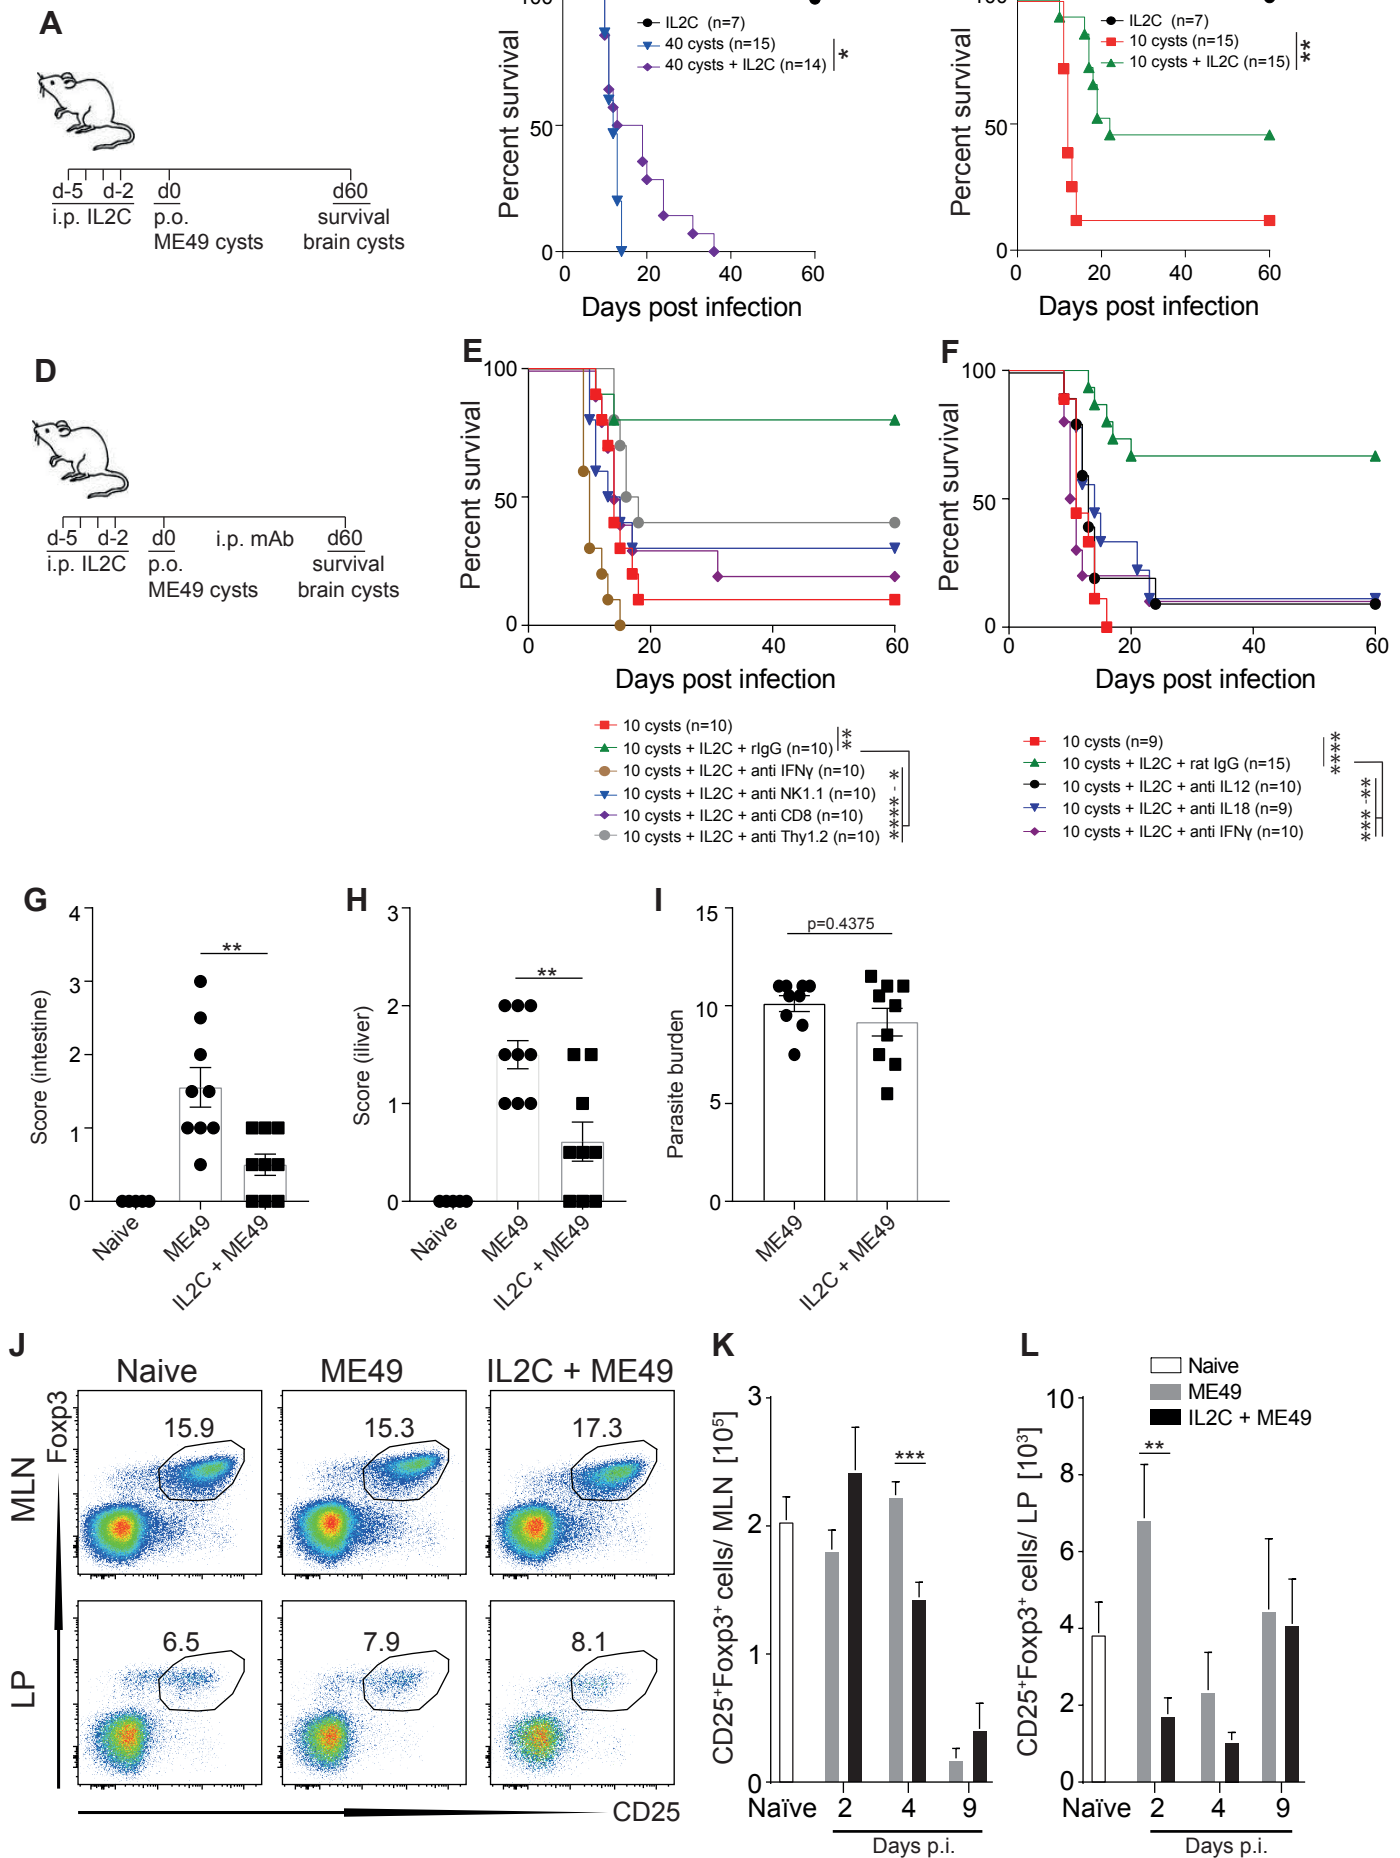

Figure 7: IL2C treatment protects mice from lethal toxoplasmosis independently of  $T_{Reg}$  expansion and parasite burden

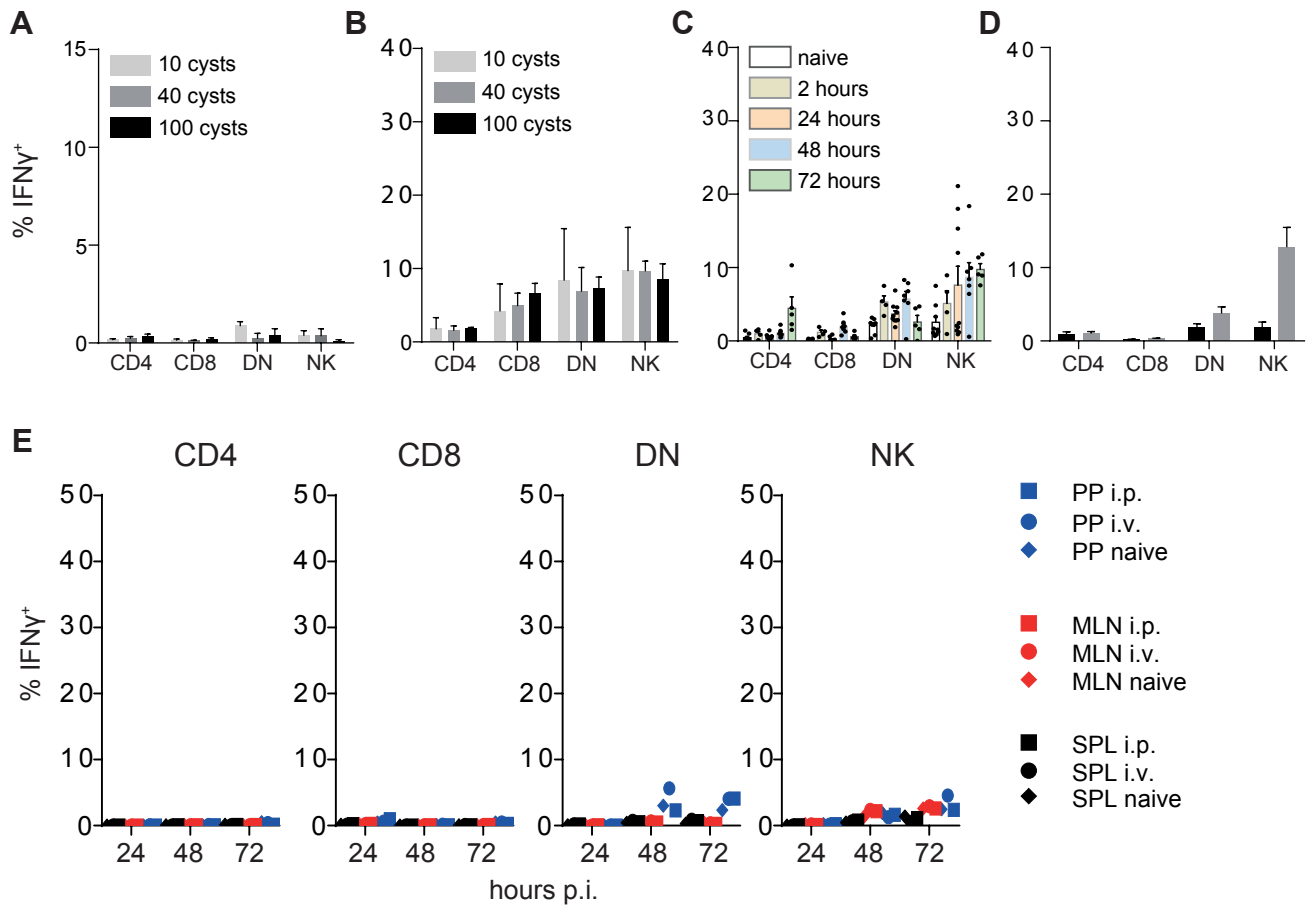

S1 Figure: Low dose tachyzoite infection does not induce rapid IFN $\gamma$  secretion

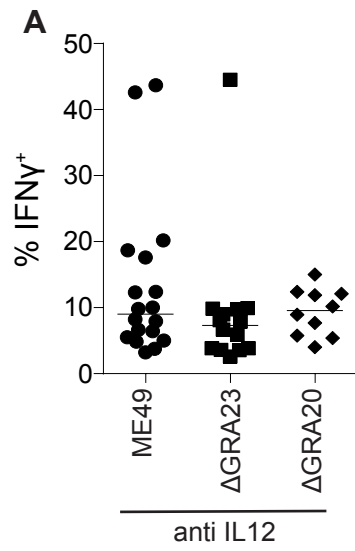

S2 Figure: IL18-driven IFN $\gamma$  secretion to *T. gondii* is independent of secreted GRA proteins

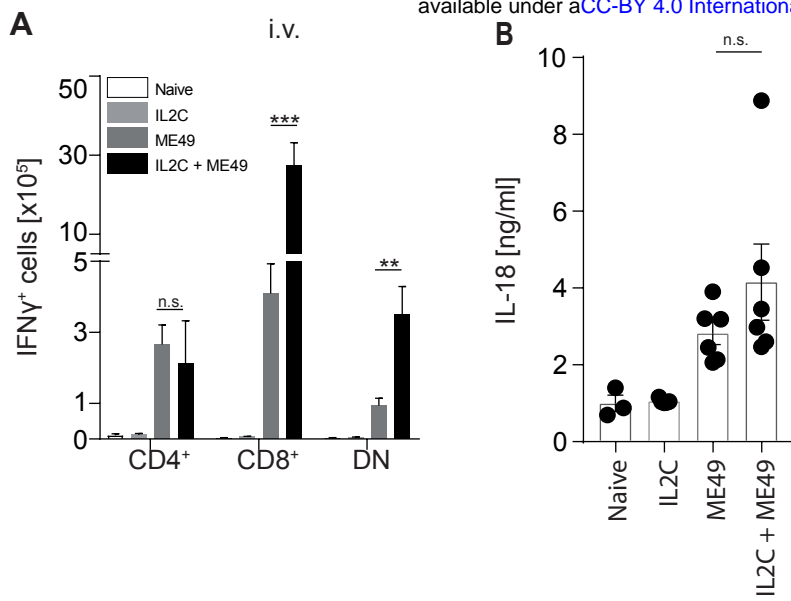

S3 Figure: IL2C treatment expands IFN $\gamma$ -secreting non-CD4 cell subsets but has no impact on upstream IL-18 secretion
